# Supplementary material for: Study protocol: Comparison of the effect of treatment with Nonsteroidal anti-inflammatory drugs added to anti-tumour necrosis factor a therapy versus anti-tumour necrosis factor a therapy alone on progression of Structural damage in the spine over two years in patients with ankyLosing spondylitis (CONSUL) – an open-label randomized controlled multicenter trial
Source: PubMed Central journal article supplement — BMJ Open. 2017 Jun 10;7(6):e014591. doi: 10.1136/bmjopen-2016-014591 (PMC5623356; doi:10.1136/bmjopen-2016-014591), 2017-06-10
Supplement: bmjopen-2016-014591.draft_revisions.pdf [file bmjopen-2016-014591.draft_revisions.pdf]

# BMJ Open

**Study protocol: COmparison of the effect of treatment with NSAIDs added to anti-TNF therapy versus anti-TNF therapy alone on progression of StrUctural damage in the spine over two years in patients with ankylosing spondylitis (CONSUL) – a randomized controlled multicenter trial**

|                                 |                                                                                                                                                                                                                                                                                                                                                                                                                                                                                                                                                                                                                                                                                                                                                                                                                                                                                  |
|---------------------------------|----------------------------------------------------------------------------------------------------------------------------------------------------------------------------------------------------------------------------------------------------------------------------------------------------------------------------------------------------------------------------------------------------------------------------------------------------------------------------------------------------------------------------------------------------------------------------------------------------------------------------------------------------------------------------------------------------------------------------------------------------------------------------------------------------------------------------------------------------------------------------------|
| Journal:                        | <i>BMJ Open</i>                                                                                                                                                                                                                                                                                                                                                                                                                                                                                                                                                                                                                                                                                                                                                                                                                                                                  |
| Manuscript ID                   | bmjopen-2016-014591                                                                                                                                                                                                                                                                                                                                                                                                                                                                                                                                                                                                                                                                                                                                                                                                                                                              |
| Article Type:                   | Protocol                                                                                                                                                                                                                                                                                                                                                                                                                                                                                                                                                                                                                                                                                                                                                                                                                                                                         |
| Date Submitted by the Author:   | 05-Oct-2016                                                                                                                                                                                                                                                                                                                                                                                                                                                                                                                                                                                                                                                                                                                                                                                                                                                                      |
| Complete List of Authors:       | Proft, Fabian; Department of Gastroenterology, Infectiology and Rheumatology, Campus Benjamin Franklin, Charité Universitätsmedizin Berlin, Rheumatology<br>Muche, Burkhard; Department of Gastroenterology, Infectiology and Rheumatology, Campus Benjamin Franklin, Charité Universitätsmedizin Berlin, Rheumatology<br>Listing, Joachim; German Rheumatism Research Centre<br>Rios-Rodriguez, Valeria; Department of Gastroenterology, Infectiology and Rheumatology, Campus Benjamin Franklin, Charité Universitätsmedizin Berlin, Rheumatology<br>Sieper, Joachim; Department of Gastroenterology, Infectiology and Rheumatology, Campus Benjamin Franklin, Charité Universitätsmedizin Berlin, Rheumatology<br>Poddubnyy, Denis; Department of Gastroenterology, Infectiology and Rheumatology, Campus Benjamin Franklin, Charité Universitätsmedizin Berlin, Rheumatology |
| <b>Primary Subject Heading</b>: | Rheumatology                                                                                                                                                                                                                                                                                                                                                                                                                                                                                                                                                                                                                                                                                                                                                                                                                                                                     |
| Secondary Subject Heading:      | Radiology and imaging                                                                                                                                                                                                                                                                                                                                                                                                                                                                                                                                                                                                                                                                                                                                                                                                                                                            |
| Keywords:                       | Ankylosing spondylitis, radiographic progression, TNF inhibitors, NSAIDs, mSASS                                                                                                                                                                                                                                                                                                                                                                                                                                                                                                                                                                                                                                                                                                                                                                                                  |
|                                 |                                                                                                                                                                                                                                                                                                                                                                                                                                                                                                                                                                                                                                                                                                                                                                                                                                                                                  |

SCHOLARONE™  
Manuscripts

1  
2  
3  
4  
5 **Study protocol: COmparison of the effect of treatment with NSAIDs**  
6 **added to anti-TNF therapy versus anti-TNF therapy alone on**  
7 **progression of StrUctural damage in the spine over two years in**  
8 **patients with ankylosing spondylitis (CONSUL) – a randomized**  
9 **controlled multicenter trial**  
10  
11

12 Fabian Proft<sup>1</sup>, Burkhard Muche<sup>1</sup>, Joachim Listing<sup>2</sup>, Valeria Rios Rodriguez<sup>1</sup>, Joachim  
13 Sieper<sup>1</sup>, Denis Poddubnyy<sup>1</sup>  
14  
15

16  
17  
18 <sup>1</sup>Department of Gastroenterology, Infectiology and Rheumatology, Campus Benjamin  
19 Franklin, Charité Universitätsmedizin Berlin, Berlin, Germany  
20

21 <sup>2</sup>German Rheumatism Research Centre, Berlin, Germany  
22  
23

24 **Corresponding author:** Prof. Dr. Denis Poddubnyy  
25

26 Department of Gastroenterology, Infectiology and Rheumatology  
27

28 Campus Benjamin Franklin  
29

30 Charité Universitätsmedizin Berlin  
31

32 Hindenburgdamm 30  
33

34 12203 Berlin, Germany  
35

36 Phone: +49 30 450 514 544  
37

38 Fax: +49 30 450 7 514 915  
39

40 E-mail: [denis.poddubnyy@charite.de](mailto:denis.poddubnyy@charite.de)  
41  
42  
43  
44  
45  
46  
47

48 Word count: 1.907 words  
49  
50  
51  
52  
53  
54  
55  
56  
57  
58  
59  
60

1  
2  
3 **Introduction:** There is some evidence that NSAIDs, in particular Celecoxib, might  
4 possess not only a symptomatic efficacy but also disease modifying properties in AS,  
5 retarding the progression of structural damage in the spine if taken continuously. In  
6 contrast this could not been proven for TNF-inhibitors, despite their good clinical  
7 efficacy on inflammatory aspects, pain and physical-function. The impact of a  
8 combined therapy (a TNF-inhibitor plus an NSAID) on radiographic spinal  
9 progression in AS remains unclear.  
10

11 **Methods and analysis:** The aim of this prospective, randomized, controlled  
12 multicentre clinical trial is to evaluate the impact of treatment with an NSAID  
13 (Celecoxib) when added to a TNF-inhibitor (Golimumab) as compared to TNF-  
14 inhibitor (Golimumab) alone on progression of structural damage in the spine over  
15 two years in patients with AS. The study consists of a 6-week screening period, a 12-  
16 week period (Phase I: Run-in Phase) of treatment with Golimumab for all subjects  
17 followed by a 96-week controlled treatment period (Phase II: Core-Phase) with  
18 Golimumab plus Celecoxib versus Golimumab alone, and a safety follow-up period of  
19 4 weeks. At week 108 the primary study endpoint (radiographic spinal progression as  
20 assessed by the modified Stoke Ankylosing Spondylitis Spine Score – mSASSS) will  
21 be evaluated.  
22

23 **Ethics and dissemination:** The study will be performed according to the ICH / GCP  
24 guidelines and the German drug law. The written approval of the Central  
25 Independent Ethics Committee, the German federal authority and the local Ethics  
26 Committees of the study centres have been obtained. Study results upon study  
27 completion are expected to be published in a peer-reviewed journal.  
28

29 **Registration details:** ClinicalTrials.gov ID: NCT02758782, EudraCT Number: 2016-  
30 000615-33.  
31

32 **Funding:** This work is supported by the German Federal Ministry of Education and  
33 Research (BMBF), Grant No. FKZ 01KG1603. MSD Sharp & Dohme GmbH provides  
34 the study drug Golimumab and financial support of the MRI sub-study.  
35  
36  
37  
38  
39  
40  
41  
42  
43  
44  
45  
46  
47  
48  
49  
50  
51  
52  
53  
54  
55  
56  
57  
58  
59  
60

## Article summary

### Strengths and limitations of this study

#### *Strengths:*

- There is no treatment with proven efficacy against radiographic spinal progression in ankylosing spondylitis
- The effect of a combination of a TNF Blocker with an NSAID on radiographic spinal progression in ankylosing spondylitis has never been investigated so far
- multicentre, randomized, controlled, prospective design;
- Patient population consists of patients at high risk of radiographic spinal progression.

#### *Limitations:*

- Study is conducted only in one country (Germany) and the intervention is not masked / blinded and is taking place in a highly selected patient population.

## Introduction

Ankylosing spondylitis (AS)[1] is a chronic inflammatory disease of unknown aetiology with primary involvement of the axial skeleton (sacroiliac joint [SIJ] and spine), starting in most of the cases in subjects under 45 years old and with a strong association with the MHC class I antigen HLA-B27, which is positive in 90-95% of the patients. AS patients can develop peripheral joint and entheses manifestations, as well as extra-articular manifestations such as anterior uveitis, psoriasis and inflammatory bowel disease[2]. The prevalence of AS is estimated to be between 0.1 and 1.4%[2]. The disease is characterized by the presence of active inflammation in the SIJ and the spine, which manifests as pain and stiffness, and by excessive new bone formation (leading to the development of syndesmophytes and ankylosis in the same areas). This will produce in up to 40% of the patients a significant functional impairment[4] and may occur with a close relationship between the grade of impairment and the duration of the disease[5]. At the same time, the disease has a relevant socio-economic impact due to disability and chronic therapies including biological drugs, generating high costs[6-7]. Reduction of clinical burden and prevention of disability can probably be best achieved by early and adequate treatment targeting both inflammation and new bone formation. According to the Assessment of SpondyloArthritis international Society (ASAS) and European League Against Rheumatism (EULAR) recommendations, the first-line therapy for patients with AS are nonsteroidal anti-inflammatory drugs (NSAIDs), including selective cyclooxygenase-2 (COX-2) antagonists, along with education and continuous exercise/physiotherapy[8]. Therapy with conventional disease-modifying anti-rheumatic drugs (DMARDs) such as methotrexate, leflunomide, and sulfasalazine may have some beneficial effect in patients with peripheral joint involvement, but in general are not effective for the treatment of axial involvement[9-11]. For those patients who had a poor response to NSAIDs, contraindications or intolerance for NSAIDs, the only effective treatment currently available is the therapy with tumour necrosis factor (TNF)-inhibitors[8, 12]; very recently secukinumab, a monoclonal antibody against interleukin (IL)-17, has been approved in the European Union (EU) for the treatment of active AS based on the positive results of two phase III studies[13]. There is some evidence that NSAIDs, in particular Celecoxib, might possess not only a symptomatic efficacy but also disease modifying properties in AS,

1  
2  
3 retarding the progression of structural damage (syndesmophytes and ankylosis) in  
4 the spine if taken continuously[14]. This might be explained by a direct inhibitory  
5 effect on osteoblast genesis and activity[15]. This effect was especially evident in AS  
6 patients with elevated C-reactive protein (CRP)[16], which is also considered a risk  
7 factor for radiographic spinal progression in AS[17]. The data from the GESPIC study  
8 (a non-interventional observational cohort) showed a similar protective effect against  
9 radiographic spinal progression in those patients who had high NSAIDs intake  
10 (defined as >50% of the maximum recommended dose) and who were at high risk for  
11 radiographic spinal progression (presence of syndesmophytes and/or elevated CRP)  
12 at baseline[18]. For diclofenac, a nonselective COX inhibitor, such effect was,  
13 however, not proven in the recently published ENRADAS trial[19]. TNF-inhibitors are  
14 used as a second line therapy in patients with AS, if NSAIDs demonstrate no or  
15 insufficient clinical effect and have until now the best effect on inflammation signs and  
16 symptoms[12]. Despite good clinical efficacy on inflammatory aspects, TNF-inhibitors  
17 are not able to retard radiographic spinal progression in AS over a period of two[20-  
18 22] or four[23] years. Many of the patients with AS treated with a TNF-inhibitor  
19 discontinue their NSAIDs due to good symptom control with the anti-TNF agent  
20 (including the 5-year GO-RAISE pivotal study on the efficacy of Golimumab in  
21 AS[23]). Therefore, it has not been possible until now to answer the question of the  
22 impact of a combined therapy (TNF blocker and NSAID) on radiographic spinal  
23 progression. It is crucial to clarify whether adding an NSAID (especially a COX-2  
24 selective one) to TNF-blocker treatment is able to stop or reduce radiographic  
25 progression, especially in patients at high risk (i.e. with elevated CRP and/or with  
26 already present syndesmophytes).

27  
28  
29  
30  
31  
32  
33  
34  
35  
36  
37  
38  
39  
40  
41  
42  
43  
44  
45  
46  
47  
48  
49  
50  
51  
52  
53  
54  
55  
56  
57  
58  
59  
60  
The aim of this prospective study is to evaluate the impact of treatment with an  
NSAID Celecoxib added to a TNF inhibitor Golimumab as compared to Golimumab  
alone on progression of structural damage in the spine over two years in patients with  
AS.

### Methods and analysis:

*Study design.* This study is a randomized, controlled, multicenter, open-label clinical trial. The study consists of a 6-week screening period, a 12-week period (Phase I: Run-in Phase) of treatment with Golimumab for all subjects followed by a 96-week controlled treatment period (Phase II: Core-Phase) with Golimumab plus Celecoxib

1  
2  
3 versus Golimumab alone, and a safety follow-up period of 4 weeks (figure 1). Only  
4 subjects with a good clinical response to Golimumab in the Phase I (achievement of  
5 a 50% improvement of the Bath Ankylosing Spondylitis Disease Activity Index  
6 (BASDAI) score – BASDAI50-response or  $\geq 2$  absolute points on the BASDAI 0-10  
7 scale response at Week 12) will be eligible for Phase II and will be randomized based  
8 on a 1:1 ratio to receive Golimumab plus Celecoxib or Golimumab alone for 96  
9 weeks. At week 108 the primary study endpoint (radiographic spinal progression as  
10 assessed by the modified Stoke Ankylosing Spondylitis Spine Score – mSASSS[24])  
11 will be evaluated. Magnetic resonance imaging (MRI) of the spine and sacroiliac  
12 joints will be performed at baseline (Week 0), and at Week 108 (or in case of early  
13 termination (ET) at Week 84 or later) in a sub-study with patients of study sites in  
14 Berlin & Brandenburg having no contraindication for this investigation.

15  
16  
17  
18  
19  
20  
21  
22  
23  
24 *Patients.* Patients of 18 years and older, diagnosed with AS due to the modified New  
25 York Criteria<sup>1</sup>, with an active disease (defined as an BASDAI-Score $>4$ ), history of an  
26 inadequate response to two different NSAID's for at least 14 days each and one of  
27 the two following risk factors for radiographic spinal progression: elevated CRP or  
28 existing syndesmophytes at screening, who gave written informed consent are going  
29 to be included in the study. Main inclusion and exclusion criteria are shown in table 1.  
30 Study participants will be recruited from 21 rheumatologic centres throughout  
31 Germany between September 2016 and presumably February 2018. 190 patients  
32 shall be assessed for eligibility (assuming a 10% screening failure rate  
33 approximately), so that 170 patients with active AS despite treatment with NSAIDs  
34 alone will be included in the phase I of the trial and treated with Golimumab. Only  
35 patients with good clinical response (achievement of BASDAI50 or reduction  $\geq 2$   
36 absolute points (on a 0-10 scale) of the BASDAI) after 12 weeks of Golimumab  
37 treatment will be enrolled in phase II of the trial. It is assumed that approximately  
38 60% (n=100) of patients included in phase I will continue in to phase II of the study,  
39 considering that elevated CRP at baseline is currently the best response predictor for  
40 TNF-inhibitor therapy. So 100 patients (n=50 in each group) will enter phase II of the  
41 trial (intention-to-treat population - ITT) after 1:1 randomization and going to be  
42 analysed for the primary and secondary outcome parameters.

43  
44  
45  
46  
47  
48  
49  
50  
51  
52  
53  
54  
55  
56  
57  
58  
59  
60  
*Outcome parameters.* The study outcome parameters are summarized in table 2.  
The primary outcome parameter of the study is radiographic spinal progression  
measured by the change in the modified Stoke Ankylosing Spondylitis Spine Score

1  
2  
3 (mSASSS) between week 12 and week 108 (primary endpoint). Secondary outcome  
4 parameters will include new syndesmophyte formation or progression of existing  
5 syndesmophytes after 2 years of treatment, change of the bone and cartilage  
6 biomarkers serum levels at week 108 in comparison to baseline, change of the  
7 enteric microbiome profile at week 108 in comparison to baseline, change of osteitis  
8 score and scores for the chronic post-inflammatory changes in the spine and  
9 sacroiliac joints on MRI by Berlin MRI scoring method at week 108 in comparison to  
10 baseline (in the MRI sub-study only) and the improvement of disease activity,  
11 function, axial mobility and quality of life measures at week 12 and week 108 in  
12 comparison to baseline. Safety outcome parameters will include evaluation of  
13 adverse events (AE's), serious AE and events of interest: infections, malignancies,  
14 gastrointestinal events (ulceration, bleeding, perforation, gastric outlet obstruction),  
15 cardiovascular events (myocardial infarction, stroke, pulmonary artery embolism,  
16 peripheral arterial or venous thrombosis), renal impairment (creatinine > 1.8 mg/dl or  
17 increase > 0.5 mg/dl vs. Baseline) and substantial (>5-fold) liver enzyme elevation.

18  
19  
20  
21  
22  
23  
24  
25  
26  
27  
28 *Data analysis plan.* The study consists of a 12-week run-in period, 96-week core  
29 period (randomized treatment) and 4-week follow-up period. The primary efficacy  
30 endpoint will be the absolute progression of the mSASSS score over two years of  
31 therapy (phase II of the trial, week 12 – week 108) in both treatment groups. The  
32 primary analysis will be based on the mean of the mSASSS scores evaluated by 2  
33 trained readers for the spinal x-rays performed at Week 12 and at Week 108 in the  
34 ITT population. A database lock will occur for the purposes of the efficacy and safety  
35 analysis, once all data up to week 112 have been collected and cleaned.

36  
37  
38  
39  
40  
41  
42 *Statistical analysis.* The primary analysis will be based on all patients who entered  
43 phase II of the trial (ITT population). Multiple imputation methods with mSASSS score  
44 at baseline as covariate will be applied to deal with missing radiographs in the  
45 primary analysis. The Mann-Whitney test will be used to compare the primary  
46 outcome (change in the mSASSS score) between the treatment groups. Cumulative  
47 probability plots will be built to visualise the finding. In a secondary analysis the  
48 Mann-Whitney test will be used to compare radiographic progression in the subgroup  
49 of patients with complete sets of radiographs. A likelihood approach will be applied to  
50 deal with missing data in secondary outcome parameters assessed at multiple time  
51 points. For that reason, linear mixed models will be applied to compare means of  
52 secondary outcome parameters over time. A non-responder imputation for missing  
53  
54  
55  
56  
57  
58  
59  
60



1  
2  
3 response data and chi-square tests will additionally be applied to compare response  
4 rates. Two-sided p values < 0.05 will be considered to be statistically significant.  
5  
6

### 7 **Ethics and dissemination:**

8 The study will be performed according to the ICH / GCP guidelines and the German  
9 drug law (Arzneimittelgesetz – AMG). The written approval of the Central  
10 Independent Ethics Committee (Ethics Committee of the Federal State Berlin), of the  
11 German federal authority (Paul-Ehrlich-Institut – PEI, Langen, Germany) and of the  
12 local Ethics Committees of the study centres have been obtained. Study results upon  
13 study completion are expected to be published in a peer-reviewed journal.  
14  
15  
16  
17

### 18 **Registration details:**

19 The study has been registered; ClinicalTrials.gov ID: NCT02758782, EudraCT  
20 Number: 2016-000615-33.  
21  
22  
23

### 24 **Author's contribution.**

25 Fabian Proft (FP), Burkard Muche (BM) and Valeria Rios Rodriguez (VRR) were  
26 involved in drafting the study protocol. Joachim Listing (JL) was involved in statistical  
27 planning and drafting the study protocol. Joachim Sieper (JS) has emerged the idea  
28 for this trial and was involved in drafting and revising the study protocol. Denis  
29 Poddubnyy (DP) has emerged the idea for this trial, was involved in drafting and  
30 revising the study protocol and is the principal investigator of this trial.  
31  
32  
33  
34  
35  
36

### 37 **Funding.**

38 This work is supported by the German Federal Ministry of Education and Research  
39 (Bundesministerium für Bildung und Forschung - BMBF), Grant No: FKZ 01KG1603.  
40 MSD Sharp & Dohme GmbH provides study drug Golimumab and supports the MRI  
41 sub-study.  
42  
43  
44  
45

### 46 **Competing interests.**

47 FP: honoraria from Novartis-Sandoz

48 BM: none.

49 JL: honoraria from Novartis-Sandoz and Pfizer

50 VRR: none.

51 JS: research grants, honoraria, speaker fees and/or consultancy payments from  
52 Abbvie, Bristol Myers Squibb, Janssen, Eli Lilly, MSD / Merck, Novartis, Pfizer,  
53 Roche, and UCB  
54  
55  
56  
57  
58  
59  
60

1  
2  
3 DP: honoraria, speaker fees and/or consultancy payments from Abbvie, Bristol Myers  
4 Squibb, Janssen, Eli Lilly, MSD / Merck, Novartis, Pfizer, Roche, and UCB.  
5  
6

## 7 8 REFERENCES

9  
10  
11 1. van der Linden S, Valkenburg HA, Cats A. Evaluation of diagnostic criteria for  
12 ankylosing spondylitis. A proposal for modification of the New York criteria. *Arthritis*  
13 *Rheum* 1984;27(4):361-8.  
14  
15

16  
17  
18 2. de Winter JJ, van Mens LJ, van der Heijde D, et al. Prevalence of peripheral and  
19 extra-articular disease in ankylosing spondylitis versus non-radiographic axial  
20 spondyloarthritis: a meta-analysis. *Arthritis Res Ther*. 2016 Sep 1;18:196. doi:  
21 10.1186/s13075-016-1093-z.  
22  
23

24  
25  
26 3. Braun J, Sieper J. Ankylosing spondylitis. *Lancet* 2007;369(9570):1379-90.  
27

28  
29 4. Landewe R, Dougados M, Mielants H, et al. Physical function in ankylosing  
30 spondylitis is independently determined by both disease activity and radiographic  
31 damage of the spine. *Ann Rheum Dis* 2009;68(6):863-7.  
32  
33

34  
35  
36 5. Feldtkeller E, Bruckel J, Khan MA. Scientific contributions of ankylosing spondylitis  
37 patient advocacy groups. *Curr Opin Rheumatol* 2000;12(4):239-47.  
38

39  
40 6. Braun J, Brandt J, Listing J, et al. Treatment of active ankylosing spondylitis with  
41 infliximab: a randomised controlled multicentre trial. *Lancet* 2002;359(9313):1187-93.  
42  
43

44  
45 7. Franke LC, Ament AJ, van de Laar MA, et al. Cost-of-illness of rheumatoid arthritis  
46 and ankylosing spondylitis. *Clin Exp Rheumatol* 2009;27(4 Suppl 55):S118-23.  
47  
48

49  
50 8. Braun J, van den Berg R, Baraliakos X, et al. 2010 update of the ASAS/EULAR  
51 recommendations for the management of ankylosing spondylitis. *Ann Rheum Dis*  
52 2011;70(6):896-904.  
53  
54

55  
56 9. Braun J, Zochling J, Baraliakos X, et al. Efficacy of sulfasalazine in patients with  
57 inflammatory back pain due to undifferentiated spondyloarthritis and early ankylosing  
58  
59  
60

1  
2  
3 spondylitis: a multicentre randomised controlled trial. *Ann Rheum Dis*  
4 2006;65(9):1147-53.

5  
6  
7 10. Haibel H, Rudwaleit M, Braun J, et al. Six months open label trial of leflunomide  
8 in active ankylosing spondylitis. *Ann Rheum Dis* 2005;64(1):124-6.

9  
10  
11 11. Haibel H, Brandt HC, Song IH, et al. No efficacy of subcutaneous methotrexate in  
12 active ankylosing spondylitis: a 16-week open-label trial. *Ann Rheum Dis*  
13 2007;66(3):419-21.

14  
15  
16 12. van der Heijde D, Sieper J, Maksymowych WP, et al. 2010 Update of the  
17 international ASAS recommendations for the use of anti-TNF agents in patients with  
18 axial spondyloarthritis. *Ann Rheum Dis* 2011;70(6):905-8.

19  
20  
21 13. Baeten D, Sieper J, Braun J, et al. Secukinumab, an Interleukin-17A Inhibitor, in  
22 Ankylosing Spondylitis. *N Engl J Med* 2015;373(26):2534-48.

23  
24  
25 14. Wanders A, Heijde D, Landewe R, et al. Nonsteroidal antiinflammatory drugs  
26 reduce radiographic progression in patients with ankylosing spondylitis: a randomized  
27 clinical trial. *Arthritis Rheum* 2005;52(6):1756-65.

28  
29  
30 15. Yoon DS, Yoo JH, Kim YH, et al. The effects of COX-2 inhibitor during osteogenic  
31 differentiation of bone marrow-derived human mesenchymal stem cells. *Stem cells*  
32 *and development* 2010;19(10):1523-33.

33  
34  
35 16. Kroon F, Landewe R, Dougados M, et al. Continuous NSAID use reverts the  
36 effects of inflammation on radiographic progression in patients with ankylosing  
37 spondylitis. *Ann Rheum Dis* 2012;71(10):1623-9.

38  
39  
40 17. Poddubnyy D, Haibel H, Listing J, et al. Baseline radiographic damage, elevated  
41 acute-phase reactant levels, and cigarette smoking status predict spinal radiographic  
42 progression in early axial spondylarthritis. *Arthritis Rheum* 2012;64(5):1388-98.

43  
44  
45 18. Poddubnyy D, Rudwaleit M, Haibel H, et al. Effect of non-steroidal anti-  
46 inflammatory drugs on radiographic spinal progression in patients with axial  
47  
48  
49  
50  
51  
52  
53  
54  
55  
56  
57  
58  
59  
60

1  
2  
3 spondyloarthritis: results from the German Spondyloarthritis Inception Cohort. *Ann*  
4 *Rheum Dis* 2012;71(10):1616-22.

5  
6  
7 19. Sieper J, Listing J, Poddubnyy D, et al. Effect of continuous versus on-demand  
8 treatment of ankylosing spondylitis with diclofenac over 2 years on radiographic  
9 progression of the spine: results from a randomised multicentre trial (ENRADAS).  
10  
11 *Ann Rheum Dis* 2016;75(8):1438-43.

12  
13  
14 20. van der Heijde D, Landewe R, Einstein S, et al. Radiographic progression of  
15 ankylosing spondylitis after up to two years of treatment with etanercept. *Arthritis*  
16 *Rheum* 2008;58(5):1324-31.

17  
18  
19 21. van der Heijde D, Landewe R, Baraliakos X, et al. Radiographic findings following  
20 two years of infliximab therapy in patients with ankylosing spondylitis. *Arthritis Rheum*  
21 *2008;58(10):3063-70.*

22  
23  
24 22. van der Heijde D, Salonen D, Weissman BN, et al. Assessment of radiographic  
25 progression in the spines of patients with ankylosing spondylitis treated with  
26 adalimumab for up to 2 years. *Arthritis Res Ther* 2009;11(4):R127.

27  
28  
29 23. Braun J, Baraliakos X, Hermann KG, et al. The effect of two golimumab doses on  
30 radiographic progression in ankylosing spondylitis: results through 4 years of the GO-  
31 RAISE trial. *Ann Rheum Dis* 2014;73(6):1107-13.

32  
33  
34 24. Creemers MC, Franssen MJ, van't Hof MA, et al. Assessment of outcome in  
35 ankylosing spondylitis: an extended radiographic scoring system. *Ann Rheum Dis*  
36 *2005;64(1):127-9.*

1  
2  
3  
4  
5  
6  
7  
8  
9  
10  
11  
12  
13  
14  
15  
16  
17  
18  
19  
20  
21  
22  
23  
24  
25  
26  
27  
28  
29  
30  
31  
32  
33  
34  
35  
36  
37  
38  
39  
40  
41  
42  
43  
44  
45  
46  
47  
48  
49  
50  
51  
52  
53  
54  
55  
56  
57  
58  
59  
60

For peer review only

| Inclusion criteria                                                                                                 | Exclusion criteria                                                    |
|--------------------------------------------------------------------------------------------------------------------|-----------------------------------------------------------------------|
| Age $\geq 18$ years                                                                                                | Presence of total spinal ankylosis                                    |
| Definite diagnosis of AS according to the modified New York criteria                                               | History of primary non-response to previous anti-TNF therapy (if any) |
| Active disease (defined as an BASDAI-Score $\geq 4$ )                                                              | Contraindications for the treatment with Golimumab and/or Celecoxib   |
| History of an inadequate response to $\geq 2$ NSAIDs taken for at least 2 weeks each                               |                                                                       |
| Risk factors for radiographic spinal progression (defined as elevated CRP or existing syndesmophytes) at screening |                                                                       |

| Efficacy:                                                                                                                                                                                                                                                                                                                                                                                                                                                                                                                                                                                                                                                                                                                                                                                                                                                                                                                                                                                                                                                                                                                                                                                                                                                                                                                                                                                                                                                                                                                                                                                                                                                                                                                                                                                                          | Safety:                                                                   |
|--------------------------------------------------------------------------------------------------------------------------------------------------------------------------------------------------------------------------------------------------------------------------------------------------------------------------------------------------------------------------------------------------------------------------------------------------------------------------------------------------------------------------------------------------------------------------------------------------------------------------------------------------------------------------------------------------------------------------------------------------------------------------------------------------------------------------------------------------------------------------------------------------------------------------------------------------------------------------------------------------------------------------------------------------------------------------------------------------------------------------------------------------------------------------------------------------------------------------------------------------------------------------------------------------------------------------------------------------------------------------------------------------------------------------------------------------------------------------------------------------------------------------------------------------------------------------------------------------------------------------------------------------------------------------------------------------------------------------------------------------------------------------------------------------------------------|---------------------------------------------------------------------------|
| <p><i>Primary endpoint:</i></p> <ul style="list-style-type: none"> <li>• Radiographic spinal progression measured by the change in the modified Stoke Ankylosing Spondylitis Spine Score (mSASSS) between week 12 and week 108.</li> </ul> <p><i>Secondary endpoints:</i></p> <ul style="list-style-type: none"> <li>• New syndesmophyte formation or progression of existing syndesmophytes after 2 years of treatment.</li> <li>• Improvement of disease activity, function, axial mobility and quality of life measures at week 12 and week 108 in comparison to baseline according to: <ul style="list-style-type: none"> <li>– BASDAI</li> <li>– ASDAS</li> <li>– CRP and erythrocyte sedimentation rate (ESR)</li> <li>– Bath AS Functional Index (BASFI)</li> <li>– Bath AS Metrology Index (BASMI) and chest expansion</li> <li>– Global assessment (patient/physician), general pain and nocturnal pain on the numeric rating scale (NRS)</li> <li>– ASAS Health Index</li> <li>– Physician Acceptable Symptom State (PhASS)</li> <li>– Patient Acceptable Symptom State (PASS)</li> <li>– Percentage of subjects who achieve an ASAS20, ASAS40, ASAS partial remission, BASDAI50 and ASDAS in comparison to baseline;</li> </ul> </li> <li>• Change of the bone and cartilage biomarkers serum levels at week 108 in comparison to baseline and their relevance for the prediction of radiographic progression.</li> <li>• Change of the enteric microbiome profile at week 108 in comparison to baseline.</li> <li>• Change of osteitis score and scores for the chronic post-inflammatory changes in the spine and sacroiliac joints (SIJ) on magnetic resonance imaging (MRI) by Berlin MRI scoring method at week 12 and week 108 in comparison to baseline – for the MRI sub-study only.</li> </ul> | <p>Adverse events (AE), serious AE and AE of interest until Week 112.</p> |

1  
2  
3  
4  
5  
6  
7  
8  
9  
10  
11  
12  
13  
14  
15  
16  
17  
18  
19  
20  
21  
22  
23  
24  
25  
26  
27  
28  
29  
30  
31  
32  
33  
34  
35  
36  
37  
38  
39  
40  
41  
42  
43  
44  
45  
46  
47  
48  
49  
50  
51  
52  
53  
54  
55  
56  
57  
58  
59  
60

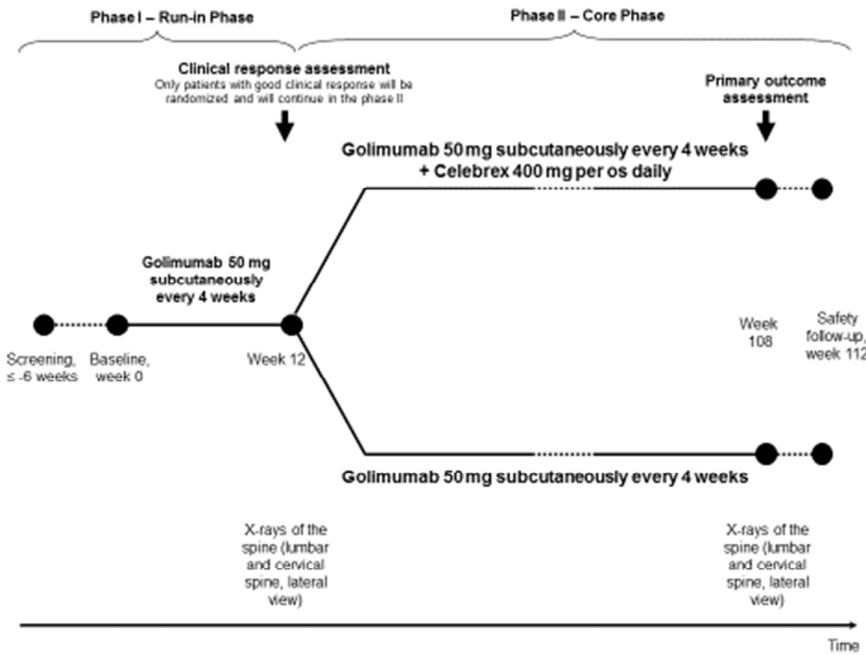

Peer review only



# BMJ Open

**Study protocol: COmparison of the effect of treatment with NSAIDs added to anti-TNF therapy versus anti-TNF therapy alone on progression of StrUctural damage in the spine over two years in patients with ankylosing spondylitis (CONSUL) – an open-Label, randomized controlled, multicenter trial**

|                                 |                                                                                                                                                                                                                                                                                                                                                                                                                                                                                                                                                                                                                                                                                                                                                                                                                                                                                  |
|---------------------------------|----------------------------------------------------------------------------------------------------------------------------------------------------------------------------------------------------------------------------------------------------------------------------------------------------------------------------------------------------------------------------------------------------------------------------------------------------------------------------------------------------------------------------------------------------------------------------------------------------------------------------------------------------------------------------------------------------------------------------------------------------------------------------------------------------------------------------------------------------------------------------------|
| Journal:                        | <i>BMJ Open</i>                                                                                                                                                                                                                                                                                                                                                                                                                                                                                                                                                                                                                                                                                                                                                                                                                                                                  |
| Manuscript ID                   | bmjopen-2016-014591.R1                                                                                                                                                                                                                                                                                                                                                                                                                                                                                                                                                                                                                                                                                                                                                                                                                                                           |
| Article Type:                   | Protocol                                                                                                                                                                                                                                                                                                                                                                                                                                                                                                                                                                                                                                                                                                                                                                                                                                                                         |
| Date Submitted by the Author:   | 31-Jan-2017                                                                                                                                                                                                                                                                                                                                                                                                                                                                                                                                                                                                                                                                                                                                                                                                                                                                      |
| Complete List of Authors:       | Proft, Fabian; Department of Gastroenterology, Infectiology and Rheumatology, Campus Benjamin Franklin, Charité Universitätsmedizin Berlin, Rheumatology<br>Muche, Burkhard; Department of Gastroenterology, Infectiology and Rheumatology, Campus Benjamin Franklin, Charité Universitätsmedizin Berlin, Rheumatology<br>Listing, Joachim; German Rheumatism Research Centre<br>Rios-Rodriguez, Valeria; Department of Gastroenterology, Infectiology and Rheumatology, Campus Benjamin Franklin, Charité Universitätsmedizin Berlin, Rheumatology<br>Sieper, Joachim; Department of Gastroenterology, Infectiology and Rheumatology, Campus Benjamin Franklin, Charité Universitätsmedizin Berlin, Rheumatology<br>Poddubnyy, Denis; Department of Gastroenterology, Infectiology and Rheumatology, Campus Benjamin Franklin, Charité Universitätsmedizin Berlin, Rheumatology |
| <b>Primary Subject Heading</b>: | Rheumatology                                                                                                                                                                                                                                                                                                                                                                                                                                                                                                                                                                                                                                                                                                                                                                                                                                                                     |
| Secondary Subject Heading:      | Radiology and imaging                                                                                                                                                                                                                                                                                                                                                                                                                                                                                                                                                                                                                                                                                                                                                                                                                                                            |
| Keywords:                       | Ankylosing spondylitis, radiographic progression, TNF inhibitors, NSAIDs, mSASS                                                                                                                                                                                                                                                                                                                                                                                                                                                                                                                                                                                                                                                                                                                                                                                                  |
|                                 |                                                                                                                                                                                                                                                                                                                                                                                                                                                                                                                                                                                                                                                                                                                                                                                                                                                                                  |

SCHOLARONE™  
Manuscripts

1  
2  
3 **Study protocol: COmparison of the effect of treatment with NSAIDs**  
4 **added to anti-TNF therapy versus anti-TNF therapy alone on**  
5 **progression of StrUctural damage in the spine over two years in**  
6 **patients with ankylosing spondylitis (CONSUL) – an open-label**  
7 **randomized controlled multicenter trial**  
8  
9

10 Fabian Proft<sup>1</sup>, Burkhard Muche<sup>1</sup>, Joachim Listing<sup>2</sup>, Valeria Rios Rodriguez<sup>1</sup>, Joachim  
11 Sieper<sup>1</sup>, Denis Poddubnyy<sup>1</sup>  
12  
13

14  
15 <sup>1</sup>Department of Gastroenterology, Infectiology and Rheumatology, Campus Benjamin  
16 Franklin, Charité Universitätsmedizin Berlin, Berlin, Germany  
17

18 <sup>2</sup>German Rheumatism Research Centre, Berlin, Germany  
19  
20

21  
22 **Corresponding author:** Prof. Dr. Denis Poddubnyy  
23

24 Department of Gastroenterology, Infectiology and Rheumatology  
25

26 Campus Benjamin Franklin  
27

28 Charité Universitätsmedizin Berlin  
29

30 Hindenburgdamm 30  
31

32 12203 Berlin, Germany  
33

34 Phone: +49 30 450 514 544  
35

36 Fax: +49 30 450 7 514 915  
37

38 E-mail: [denis.poddubnyy@charite.de](mailto:denis.poddubnyy@charite.de)  
39  
40  
41  
42  
43  
44  
45

46 Word count: 2.770 words  
47  
48  
49  
50  
51  
52  
53  
54  
55  
56  
57  
58  
59  
60

1  
2  
3 **Introduction:** There is some evidence that NSAIDs, in particular Celecoxib, might  
4 possess not only a symptomatic efficacy but also disease modifying properties in AS,  
5 retarding the progression of structural damage in the spine if taken continuously. In  
6 contrast, this remains controversial for TNF inhibitors, despite their good clinical  
7 efficacy on inflammatory aspects, pain and physical-function. The impact of a  
8 combined therapy (a TNF inhibitor plus an NSAID) on radiographic spinal  
9 progression in AS is unclear.  
10

11 **Methods and analysis:** The aim of this prospective, open-label, randomized,  
12 controlled multicentre clinical trial is to evaluate the impact of treatment with an  
13 NSAID (Celecoxib) when added to a TNF inhibitor (Golimumab) as compared to TNF  
14 inhibitor (Golimumab) alone on progression of structural damage in the spine over  
15 two years in patients with AS. The study consists of a 6-week screening period, a 12-  
16 week period (Phase I: Run-in Phase) of treatment with Golimumab for all subjects  
17 followed by a 96-week controlled treatment period (Phase II: Core Phase) with  
18 Golimumab plus Celecoxib versus Golimumab alone, and a safety follow-up period of  
19 4 weeks. At week 108 the primary study endpoint (radiographic spinal progression as  
20 assessed by the modified Stoke Ankylosing Spondylitis Spine Score – mSASSS) will  
21 be evaluated.  
22

23 **Ethics and dissemination:** The study will be performed according to the ICH / GCP  
24 guidelines and the German drug law. The written approval of the Central  
25 Independent Ethics Committee, the German federal authority and the local Ethics  
26 Committees of the study centres have been obtained. Study results upon study  
27 completion are expected to be published in a peer-reviewed journal.  
28

29 **Registration details:** ClinicalTrials.gov ID: NCT02758782, EudraCT Number: 2016-  
30 000615-33.  
31

32 **Funding:** This work is supported by the German Federal Ministry of Education and  
33 Research (BMBF), Grant No. FKZ 01KG1603. MSD Sharp & Dohme GmbH provides  
34 the study drug Golimumab and financial support of the MRI sub-study.  
35  
36  
37  
38  
39  
40  
41  
42  
43  
44  
45  
46  
47  
48  
49  
50  
51  
52  
53  
54  
55  
56  
57  
58  
59  
60

## Article summary

### Strengths and limitations of this study

#### *Strengths:*

- This is the first prospective randomized controlled multicentre trial with the objective to investigate the effect of a combination of a TNF inhibitor with an NSAID on radiographic spinal progression in ankylosing spondylitis.
- The primary outcome measure (radiographic spinal progression) is not dependent on.
- Patient population consists of patients at high risk of radiographic spinal progression.

#### *Limitations:*

- Study is conducted only in one country (Germany)
- The intervention is not masked / blinded
- Highly selected patient population
- Assumptions made for the sample size calculation are based on data obtained separately for TNF inhibitors and NSAIDs.
- The sample size calculation are based on data obtained separately for TNF inhibitors and NSAIDs.

## Introduction

Ankylosing spondylitis (AS) is a chronic inflammatory disease of unknown aetiology with primary involvement of the axial skeleton (sacroiliac joint [SIJ] and spine), starting in most of the cases in subjects under 45 years<sup>1</sup> of age (mean age onset about 26 years<sup>2</sup>), with a strong association with the MHC class I antigen HLA-B27, which is positive in 80-90% of the patients<sup>1</sup>. AS patients can develop peripheral arthritis and enthesitis, as well as extra-articular manifestations such as anterior uveitis, psoriasis and inflammatory bowel disease<sup>3</sup>. The prevalence of AS is estimated to be between 0.1 and 1.4%<sup>4</sup>. The disease is characterized by the presence of active inflammation in the SIJ and the spine, which manifests as pain and stiffness, and by excessive new bone formation (leading to the development of syndesmophytes and ankylosis in the same areas). This results in a significant functional impairment in up to 40% of the patients<sup>5</sup>.<sup>6</sup> Given young age at disease onset in the majority of patients, impairment of the functional status in AS causing disability has a relevant socio-economic impact<sup>7</sup>. Reduction of clinical burden and prevention of disability can probably be best achieved by early and adequate treatment targeting both inflammation and new bone formation. According to the Assessment of SpondyloArthritis international Society (ASAS) and European League Against Rheumatism (EULAR) recommendations, the first-line therapy for patients with AS are nonsteroidal anti-inflammatory drugs (NSAIDs), including selective cyclooxygenases-2 (COX-2) antagonists, along with education and continuous exercise/physiotherapy<sup>8</sup>. Therapy with conventional disease-modifying anti-rheumatic drugs (DMARDs) such as methotrexate, leflunomide, and sulfasalazine may have some beneficial effect in patients with peripheral joint involvement, but in general are not effective for the treatment of axial involvement<sup>9-11</sup>. For those patients who had a poor response to NSAIDs, contraindications or intolerance for NSAIDs, the only effective treatment currently available is the therapy with tumour necrosis factor (TNF)-inhibitors<sup>8</sup>; or with a recently introduced monoclonal antibody against interleukin (IL)-17 secukinumab<sup>12</sup>. There is some evidence that NSAIDs, in particular Celecoxib, might possess not only a symptomatic efficacy but also disease modifying properties in AS, retarding the progression of structural damage (syndesmophytes and ankylosis) in the spine if taken continuously<sup>13</sup>. This might be explained by a direct inhibitory effect on osteoblast genesis and activity<sup>14</sup>. This effect was especially

1  
2  
3 evident in AS patients with elevated C-reactive protein (CRP)<sup>15</sup>, which is also  
4 considered a risk factor for radiographic spinal progression in AS<sup>16</sup>. The data from  
5 the GESPIC study (a non-interventional observational cohort) showed a similar  
6 protective effect against radiographic spinal progression in those patients who had  
7 high NSAIDs intake (defined as >50% of the maximum recommended dose) and who  
8 were at high risk for radiographic spinal progression (presence of syndesmophytes  
9 and/or elevated CRP) at baseline<sup>17</sup>. For diclofenac, a nonselective COX inhibitor,  
10 such effect was, however, not proven in the recently published ENRADAS trial<sup>18</sup>.  
11 TNF-inhibitors are used as a second line therapy in patients with AS, if NSAIDs  
12 demonstrate no or insufficient clinical effect<sup>19</sup>. Despite high anti-inflammatory  
13 capacity, the existing data on the effect of TNF inhibitors on radiographic spinal  
14 progression is controversial. While some studies could not show a retardation of  
15 radiographic spinal progression in AS over a period of two<sup>20-22</sup> or four<sup>23</sup> years, there  
16 are three observational studies suggesting that it may take more than four years to  
17 detect such an effect<sup>24-26</sup> and that early (within the first five or ten years of the  
18 disease) initiation of anti-TNF therapy might play a key role<sup>25 26</sup>. However, no  
19 prospective controlled trials have been conducted so far to confirm these  
20 observations.  
21  
22

23  
24  
25  
26  
27  
28  
29  
30  
31  
32  
33 Many of the patients with AS treated with a TNF-inhibitor discontinue their NSAIDs  
34 due to good symptom control with the anti-TNF agent (including the 5-year GO-  
35 RAISE pivotal study on the efficacy of Golimumab in AS<sup>23</sup>). Therefore, it has not  
36 been possible until now to answer the question of the impact of a combined therapy  
37 (TNF inhibitor and NSAID) on radiographic spinal progression. It is crucial to clarify  
38 whether adding an NSAID (especially a COX-2 selective one) to TNF inhibitor  
39 treatment is able to stop or reduce radiographic progression, especially in patients at  
40 high risk (i.e. with elevated CRP and/or with already present syndesmophytes).  
41 Recently, results of an observational study indicating inhibition of radiographic spinal  
42 progression with a combination of a TNF inhibitor with a high dose NSAID were  
43 presented<sup>27</sup> stressing a need for a prospective interventional trial.  
44  
45  
46  
47  
48  
49  
50  
51

52  
53 The aim of this prospective study is to evaluate the impact of treatment with an  
54 NSAID Celecoxib added to a TNF inhibitor Golimumab as compared to Golimumab  
55 alone on progression of structural damage in the spine over two years in patients with  
56 AS.  
57  
58  
59  
60

## Methods and analysis:

*Study design.* This study is a randomized, controlled, multicenter, open-label clinical trial. The study consists of a 6-week screening period, a 12-week period (Phase I: Run-in Phase) of treatment with Golimumab 50 mg subcutaneously (sc) every four weeks for all subjects followed by a 96-week controlled treatment period (Phase II: Core-Phase) with Golimumab plus Celecoxib versus Golimumab alone, and a safety follow-up period of 4 weeks (figure 1). Only subjects with a good clinical response to Golimumab in the Phase I (improvement of the Bath Ankylosing Spondylitis Disease Activity Index (BASDAI) score by  $\geq 2$  absolute points on a 0-10 scale response at Week 12) will be eligible for Phase II and will be randomized based on a 1:1 ratio to receive Golimumab 50mg sc every four weeks plus Celecoxib (in a daily dose of 400mg per day) or Golimumab 50 mg sc every four weeks alone for 96 weeks. At week 108 the primary study endpoint (radiographic spinal progression as assessed by the modified Stoke Ankylosing Spondylitis Spine Score – mSASSS<sup>28</sup>) will be evaluated. Magnetic resonance imaging (MRI) of the spine and sacroiliac joints will be performed at baseline (Week 0), and at Week 108 (or in case of early termination (ET) at Week 84 or later) in a sub-study of approximately 60 patients with no contraindication for this investigation.

*Patients.* Patients of 18 years and older, diagnosed with AS due to the modified New York Criteria<sup>29</sup>, with an active disease (defined as an BASDAI-Score  $> 4$ ), history of an inadequate response to therapeutic trials of at least two NSAIDs taken in a maximal recommended or tolerated anti-inflammatory dose for at least four weeks in total and at least one of the two following risk factors for radiographic spinal progression: elevated CRP or already present syndesmophyte(s) at screening, and who gave written informed consent are going to be included in the study. Key inclusion and exclusion criteria are shown in table 1. Study participants will be recruited from 21 rheumatologic centres throughout Germany between September 2016 and presumably February 2018. 190 patients shall be assessed for eligibility (assuming a 10% screening failure rate), so that 170 patients with active AS despite treatment with NSAIDs alone will be included in the phase I of the trial and treated with Golimumab. Only patients with good clinical response (BASDAI-reduction by  $\geq 2$  absolute points (on a 0-10 scale) after 12 weeks of Golimumab treatment will be enrolled in phase II (Core Phase) of the trial. It is assumed that approximately 60%

1  
2  
3 (n=100) of patients included in phase I will continue in to phase II of the study,  
4 considering that elevated CRP at baseline is currently the best response predictor for  
5 TNF-inhibitor therapy. Thus, 100 patients (n=50 in each group) will enter phase II of  
6 the trial (intention-to-treat population - ITT) after 1:1 randomization and will be  
7 analysed for the primary and secondary outcome parameters.  
8  
9

10  
11 *Outcome parameters.* The study outcome parameters are summarized in table 2.  
12 The primary outcome parameter of the study is radiographic spinal progression  
13 measured by the change in the modified Stoke Ankylosing Spondylitis Spine Score  
14 (mSASSS) between week 12 and week 108 (primary endpoint). Secondary outcome  
15 parameters include new syndesmophyte formation or progression of existing  
16 syndesmophytes after 2 years of treatment, change of the bone and cartilage  
17 biomarkers serum levels at week 108 in comparison to baseline, change of the  
18 enteric microbiome profile at week 108 in comparison to baseline, change of osteitis  
19 score and scores for the chronic post-inflammatory changes in the spine and  
20 sacroiliac joints on MRI by Berlin MRI scoring method at week 108 in comparison to  
21 baseline (in the MRI sub-study only) and the improvement of disease activity,  
22 function, axial mobility and quality of life measures at week 12 and week 108 in  
23 comparison to baseline. Safety outcome parameters include evaluation of adverse  
24 events (AE's), serious AE and AEs of interest: infections, malignancies,  
25 gastrointestinal events (ulceration, bleeding, perforation, gastric outlet obstruction),  
26 cardiovascular events (myocardial infarction, stroke, pulmonary artery embolism,  
27 peripheral arterial or venous thrombosis), renal impairment (creatinine > 1.8 mg/dl or  
28 increase > 0.5 mg/dl vs. Baseline) and substantial (> 5-fold) liver enzyme elevation.  
29  
30

31  
32 *Data analysis plan.* The study consists of a 12-week run-in period, 96-week core  
33 period (randomized treatment) and 4-week follow-up period. The primary efficacy  
34 endpoint will be the absolute progression of the mSASSS score after two years of  
35 therapy (phase II of the trial, week 12 – week 108) in both treatment groups. The  
36 primary analysis will be based on the mean of the mSASSS scores obtained by 2  
37 trained readers for the spinal x-rays performed at Week 12 and at Week 108 in the  
38 ITT population. A database lock will occur for the purposes of the efficacy and safety  
39 analysis, once all data up to week 112 have been collected and cleaned.  
40  
41

42  
43 *Statistical analysis.* The primary analysis will be based on all patients who entered  
44 phase II of the trial (ITT population). Multiple imputation methods with mSASSS score  
45  
46  
47  
48  
49  
50  
51  
52  
53  
54  
55  
56  
57  
58  
59  
60



1  
2  
3 at baseline as covariate will be applied to deal with missing radiographs in the  
4 primary analysis. The Mann-Whitney test will be used to compare the primary  
5 outcome (change in the mSASSS score) between the treatment groups. Cumulative  
6 probability plots will be built to visualise the finding. In a secondary analysis the  
7 Mann-Whitney test will be used to compare radiographic progression in the subgroup  
8 of patients with complete sets of radiographs. A likelihood approach will be applied to  
9 deal with missing data in secondary outcome parameters assessed at multiple time  
10 points. For that reason, linear mixed models will be applied to compare means of  
11 secondary outcome parameters over time. A non-responder imputation for missing  
12 response data and chi-square tests will additionally be applied to compare response  
13 rates. Two-sided p values < 0.05 will be considered to be statistically significant.  
14  
15

16  
17  
18  
19  
20  
21 *Sample Size Justification.* The sample size calculation is based on the findings of  
22 Kroon et al.<sup>15</sup> our own results from GESPIC Cohort<sup>17</sup>, and those of Braun et al<sup>23</sup>. We  
23 assume a worsening in the mSASSS score of  $1.7 \pm 2.8$  in patients of the control group  
24 and of  $0.2 \pm 1.6$  in patients with continuous NSAIDs intake. We considered such a  
25 difference of 1.5 mSASSS units as clinically relevant and planned the sample size of  
26 this study by means of a two-sided ( $\alpha=0.05$ ) Welch-Satterthwaite t-test accordingly.  
27 To detect the mentioned difference with an 80% power, the sample size of  $n=38$  in  
28 each group is needed in the phase II of the trial. This is also true if the Mann-Whitney  
29 test is applied. However, the power will decrease by the application of multiple  
30 imputations to deal with missing radiographs of dropouts in the ITT population. We  
31 estimated this decrease by: a) an estimation of dropout rates and b) the use of own  
32 mSASSS data. Considering that all subjects enrolled in the phase II will be  
33 responders to Golimumab therapy receiving this same treatment for the whole period  
34 of the trial, along with our experience in conducting randomized controlled trials, we  
35 presume dropout rates of less than 20% during phase II. For this reason and based  
36 on our own mSASSS data, we expect an increase in the variance of mSASSS  
37 progression because of multiple imputation by less than 25%. Considering this  
38 possible increase, a sample size of  $n = 100$  patients is needed for phase II of the trial  
39 to detect the expected and clinically relevant difference of on average 1.5 mSASSS  
40 points with an 80% power in the ITT population. In addition we assumed that 60% of  
41 the subjects enrolled in phase I of the study would be eligible for randomization and  
42 participation in phase II (based on the rate of the BASDAI50 response in AS patients  
43  
44  
45  
46  
47  
48  
49  
50  
51  
52  
53  
54  
55  
56  
57  
58  
59  
60

1  
2  
3 with elevated CRP), giving a total n=170 subjects to be included in the phase I of the  
4 trial.  
5  
6  
7

### 8 9 **Ethics and dissemination:**

10 The study will be performed according to the ICH / GCP guidelines and the German  
11 drug law (Arzneimittelgesetz – AMG). The written approval of the Central  
12 Independent Ethics Committee (Ethics Committee of the Federal State Berlin), of the  
13 German federal authority (Paul-Ehrlich-Institut – PEI, Langen, Germany) and of the  
14 local Ethics Committees of the study centres have been obtained. Study results upon  
15 study completion are expected to be published in a peer-reviewed journal.  
16  
17  
18  
19

### 20 21 **Registration details:**

22 The study has been registered; ClinicalTrials.gov ID: NCT02758782, EudraCT  
23 Number: 2016-000615-33.  
24  
25

### 26 27 **Author's contribution.**

28 Fabian Proft (FP), Burkard Muche (BM) and Valeria Rios Rodriguez (VRR) were  
29 involved in drafting the study protocol. Joachim Listing (JL) was involved in statistical  
30 planning and drafting the study protocol. Joachim Sieper (JS) has emerged the idea  
31 for this trial and was involved in drafting and revising the study protocol. Denis  
32 Poddubnyy (DP) has emerged the idea for this trial, was involved in drafting and  
33 revising the study protocol and is the principal investigator of this trial.  
34  
35  
36  
37  
38

### 39 40 **Funding.**

41 This work is supported by the German Federal Ministry of Education and Research  
42 (Bundesministerium für Bildung und Forschung - BMBF), Grant No: FKZ 01KG1603.  
43 MSD Sharp & Dohme GmbH provides study drug Golimumab and supports the MRI  
44 sub-study.  
45  
46  
47

### 48 49 **Competing interests.**

50 FP: consultancy payments from Novartis. BM: consultancy payments from Novartis  
51 and UCB.  
52

53 JL: honoraria from Novartis and Pfizer.  
54

55 VRR: none.  
56  
57  
58  
59  
60

1  
2  
3 JS: research grants from Abbvie, Bristol Myers Squibb, Janssen, MSD, Pfizer, and  
4 Roche; speaker fees and/or consultancy payments from Abbvie, Bristol Myers  
5 Squibb, Janssen, Eli Lilly, MSD / Merck, Novartis, Pfizer, Roche, and UCB  
6  
7

8 DP: research grants from Abbvie, MSD, and Novartis; speaker fees and/or  
9 consultancy payments from Abbvie, Bristol Myers Squibb, Janssen, Eli Lilly, MSD /  
10 Merck, Novartis, Pfizer, Roche, and UCB.  
11  
12

13  
14 **Figure legend:**  
15

16  
17  
18 Figure 1: Study design.  
19  
20  
21  
22  
23  
24  
25  
26  
27  
28  
29  
30  
31  
32  
33  
34  
35  
36  
37  
38  
39  
40  
41  
42  
43  
44  
45  
46  
47  
48  
49  
50  
51  
52  
53  
54  
55  
56  
57  
58  
59  
60

**Tables:**

| Inclusion criteria                                                                                                 | Exclusion criteria                                                    |
|--------------------------------------------------------------------------------------------------------------------|-----------------------------------------------------------------------|
| Age $\geq 18$ years                                                                                                | Presence of total spinal ankylosis                                    |
| Definite diagnosis of AS according to the modified New York criteria                                               | History of primary non-response to previous anti-TNF therapy (if any) |
| Active disease (defined as BASDAI $\geq 4$ )                                                                       | Contraindications for the treatment with Golimumab and/or Celecoxib   |
| History of an inadequate response to a therapeutic trials of at least two NSAIDs                                   |                                                                       |
| Risk factors for radiographic spinal progression (defined as elevated CRP or existing syndesmophytes) at screening |                                                                       |

Table 1: Main inclusion and exclusion criteria.

1  
2  
3  
4  
5  
6  
7  
8  
9  
10  
11  
12  
13  
14  
15  
16  
17  
18  
19  
20  
21  
22  
23  
24  
25  
26  
27  
28  
29  
30  
31  
32  
33  
34  
35  
36  
37  
38  
39  
40  
41  
42  
43  
44  
45  
46  
47  
48  
49  
50  
51  
52  
53  
54  
55  
56  
57  
58  
59  
60

|                  |                |
|------------------|----------------|
| <u>Efficacy:</u> | <u>Safety:</u> |
|------------------|----------------|

For peer review only

|                                                                                                                                                                                                                                                                                                                                                                                                                                                                              |                                                                                                                                                                                                                                                                                                                                                                                                                                                                                                                                                                                                                                                                                                                                                                                                                                                                                                                                                                                                                                                                                                                                                                                                                                                                                                                                                                                                                                                                                                                                                                                                                                                                                                                                                                                                                    |                                                                           |
|------------------------------------------------------------------------------------------------------------------------------------------------------------------------------------------------------------------------------------------------------------------------------------------------------------------------------------------------------------------------------------------------------------------------------------------------------------------------------|--------------------------------------------------------------------------------------------------------------------------------------------------------------------------------------------------------------------------------------------------------------------------------------------------------------------------------------------------------------------------------------------------------------------------------------------------------------------------------------------------------------------------------------------------------------------------------------------------------------------------------------------------------------------------------------------------------------------------------------------------------------------------------------------------------------------------------------------------------------------------------------------------------------------------------------------------------------------------------------------------------------------------------------------------------------------------------------------------------------------------------------------------------------------------------------------------------------------------------------------------------------------------------------------------------------------------------------------------------------------------------------------------------------------------------------------------------------------------------------------------------------------------------------------------------------------------------------------------------------------------------------------------------------------------------------------------------------------------------------------------------------------------------------------------------------------|---------------------------------------------------------------------------|
| <p>1</p> <p>2</p> <p>3</p> <p>4</p> <p>5</p> <p>6</p> <p>7</p> <p>8</p> <p>9</p> <p>10</p> <p>11</p> <p>12</p> <p>13</p> <p>14</p> <p>15</p> <p>16</p> <p>17</p> <p>18</p> <p>19</p> <p>20</p> <p>21</p> <p>22</p> <p>23</p> <p>24</p> <p>25</p> <p>26</p> <p>27</p> <p>28</p> <p>29</p> <p>30</p> <p>31</p> <p>32</p> <p>33</p> <p>34</p> <p>35</p> <p>36</p> <p>37</p> <p>38</p> <p>39</p> <p>40</p> <p>41</p> <p>42</p> <p>43</p> <p>44</p> <p>45</p> <p>46</p> <p>47</p> | <p><i>Primary endpoint:</i></p> <ul style="list-style-type: none"> <li>• Radiographic spinal progression measured by the change in the modified Stoke Ankylosing Spondylitis Spine Score (mSASSS) between week 12 and week 108.</li> </ul> <p><i>Secondary endpoints:</i></p> <ul style="list-style-type: none"> <li>• New syndesmophyte formation or progression of existing syndesmophytes after 2 years of treatment.</li> <li>• Improvement of disease activity, function, axial mobility and quality of life measures at week 12 and week 108 in comparison to baseline according to: <ul style="list-style-type: none"> <li>– BASDAI</li> <li>– ASDAS</li> <li>– CRP and erythrocyte sedimentation rate (ESR)</li> <li>– Bath AS Functional Index (BASFI)</li> <li>– Bath AS Metrology Index (BASMI) and chest expansion</li> <li>– Global assessment (patient/physician), general pain and nocturnal pain on the numeric rating scale (NRS)</li> <li>– ASAS Health Index</li> <li>– Physician Acceptable Symptom State (PhASS)</li> <li>– Patient Acceptable Symptom State (PASS)</li> <li>– Percentage of subjects who achieve an ASAS20, ASAS40, ASAS partial remission, BASDAI50 and ASDAS in comparison to baseline;</li> </ul> </li> <li>• Change of the bone and cartilage biomarkers serum levels at week 108 in comparison to baseline and their relevance for the prediction of radiographic progression.</li> <li>• Change of the enteric microbiome profile at week 108 in comparison to baseline.</li> <li>• Change of osteitis score and scores for the chronic post-inflammatory changes in the spine and sacroiliac joints (SIJ) on magnetic resonance imaging (MRI) by Berlin MRI scoring method at week 12 and week 108 in comparison to baseline – for the MRI sub-study only.</li> </ul> | <p>Adverse events (AE), serious AE and AE of interest until Week 112.</p> |
|------------------------------------------------------------------------------------------------------------------------------------------------------------------------------------------------------------------------------------------------------------------------------------------------------------------------------------------------------------------------------------------------------------------------------------------------------------------------------|--------------------------------------------------------------------------------------------------------------------------------------------------------------------------------------------------------------------------------------------------------------------------------------------------------------------------------------------------------------------------------------------------------------------------------------------------------------------------------------------------------------------------------------------------------------------------------------------------------------------------------------------------------------------------------------------------------------------------------------------------------------------------------------------------------------------------------------------------------------------------------------------------------------------------------------------------------------------------------------------------------------------------------------------------------------------------------------------------------------------------------------------------------------------------------------------------------------------------------------------------------------------------------------------------------------------------------------------------------------------------------------------------------------------------------------------------------------------------------------------------------------------------------------------------------------------------------------------------------------------------------------------------------------------------------------------------------------------------------------------------------------------------------------------------------------------|---------------------------------------------------------------------------|

Table 2: Study outcome parameters.

REFERENCES:

1. Braun J, Sieper J. Ankylosing spondylitis. *Lancet* 2007;369(9570):1379-90. doi: 10.1016/S0140-6736(07)60635-7
2. Braun J, Rudwaleit M, Sieper J. [Spondyloarthritides]. *Internist (Berl)* 2011;52(6):657-70. doi: 10.1007/s00108-010-2766-3
3. de Winter JJ, van Mens LJ, van der Heijde D, et al. Prevalence of peripheral and extra-articular disease in ankylosing spondylitis versus non-radiographic axial spondyloarthritis: a meta-analysis. *Arthritis Res Ther* 2016;18:196. doi: 10.1186/s13075-016-1093-z
4. Sieper J, Poddubnyy D. Axial spondyloarthritis. *Lancet* 2017 doi: 10.1016/S0140-6736(16)31591-4
5. Feldtkeller E, Bruckel J, Khan MA. Scientific contributions of ankylosing spondylitis patient advocacy groups. *Curr Opin Rheumatol* 2000;12(4):239-47.
6. Landewe R, Dougados M, Mielants H, et al. Physical function in ankylosing spondylitis is independently determined by both disease activity and radiographic damage of the spine. *Ann Rheum Dis* 2009;68(6):863-7. doi: 10.1136/ard.2008.091793
7. Franke LC, Ament AJ, van de Laar MA, et al. Cost-of-illness of rheumatoid arthritis and ankylosing spondylitis. *Clin Exp Rheumatol* 2009;27(4 Suppl 55):S118-23.
8. van der Heijde D, Ramiro S, Landewe R, et al. 2016 update of the ASAS-EULAR management recommendations for axial spondyloarthritis. *Ann Rheum Dis* 2017 doi: 10.1136/annrheumdis-2016-210770
9. Braun J, Zochling J, Baraliakos X, et al. Efficacy of sulfasalazine in patients with inflammatory back pain due to undifferentiated spondyloarthritis and early ankylosing spondylitis: a multicentre randomised controlled trial. *Ann Rheum Dis* 2006;65(9):1147-53. doi: 10.1136/ard.2006.052878
10. Haibel H, Rudwaleit M, Braun J, et al. Six months open label trial of leflunomide in active ankylosing spondylitis. *Ann Rheum Dis* 2005;64(1):124-6. doi: 10.1136/ard.2003.019174
11. Haibel H, Brandt HC, Song IH, et al. No efficacy of subcutaneous methotrexate in active ankylosing spondylitis: a 16-week open-label trial. *Ann Rheum Dis* 2007;66(3):419-21. doi: 10.1136/ard.2006.054098
12. Baeten D, Sieper J, Braun J, et al. Secukinumab, an Interleukin-17A Inhibitor, in Ankylosing Spondylitis. *N Engl J Med* 2015;373(26):2534-48. doi: 10.1056/NEJMoa1505066
13. Wanders A, Heijde D, Landewe R, et al. Nonsteroidal antiinflammatory drugs reduce radiographic progression in patients with ankylosing spondylitis: a randomized clinical trial. *Arthritis Rheum* 2005;52(6):1756-65. doi: 10.1002/art.21054
14. Yoon DS, Yoo JH, Kim YH, et al. The effects of COX-2 inhibitor during osteogenic differentiation of bone marrow-derived human mesenchymal stem cells. *Stem Cells Dev* 2010;19(10):1523-33. doi: 10.1089/scd.2009.0393
15. Kroon F, Landewe R, Dougados M, et al. Continuous NSAID use reverts the effects of inflammation on radiographic progression in patients with ankylosing spondylitis. *Ann Rheum Dis* 2012;71(10):1623-9. doi: 10.1136/annrheumdis-2012-201370
16. Poddubnyy D, Haibel H, Listing J, et al. Baseline radiographic damage, elevated acute-phase reactant levels, and cigarette smoking status predict spinal radiographic progression in early axial spondylarthritis. *Arthritis Rheum* 2012;64(5):1388-98. doi: 10.1002/art.33465
17. Poddubnyy D, Rudwaleit M, Haibel H, et al. Effect of non-steroidal anti-inflammatory drugs on radiographic spinal progression in patients with axial spondyloarthritis: results from the German Spondyloarthritis Inception Cohort. *Ann Rheum Dis* 2012;71(10):1616-22. doi: 10.1136/annrheumdis-2011-201252
18. Sieper J, Listing J, Poddubnyy D, et al. Effect of continuous versus on-demand treatment of ankylosing spondylitis with diclofenac over 2 years on radiographic progression of the spine: results from a randomised multicentre trial (ENRADAS). *Ann Rheum Dis* 2016;75(8):1438-43. doi: 10.1136/annrheumdis-2015-207897
19. van der Heijde D, Sieper J, Maksymowych WP, et al. 2010 Update of the international ASAS recommendations for the use of anti-TNF agents in patients with axial spondyloarthritis. *Ann Rheum Dis* 2011;70(6):905-8. doi: 10.1136/ard.2011.151563

- 1  
2  
3 20. van der Heijde D, Landewe R, Einstein S, et al. Radiographic progression of ankylosing spondylitis  
4 after up to two years of treatment with etanercept. *Arthritis Rheum* 2008;58(5):1324-31. doi:  
5 10.1002/art.23471
- 6 21. van der Heijde D, Landewe R, Baraliakos X, et al. Radiographic findings following two years of  
7 infliximab therapy in patients with ankylosing spondylitis. *Arthritis Rheum* 2008;58(10):3063-  
8 70. doi: 10.1002/art.23901
- 9 22. van der Heijde D, Salonen D, Weissman BN, et al. Assessment of radiographic progression in the  
10 spines of patients with ankylosing spondylitis treated with adalimumab for up to 2 years.  
11 *Arthritis Res Ther* 2009;11(4):R127. doi: 10.1186/ar2794
- 12 23. Braun J, Baraliakos X, Hermann KG, et al. The effect of two golimumab doses on radiographic  
13 progression in ankylosing spondylitis: results through 4 years of the GO-RAISE trial. *Ann*  
14 *Rheum Dis* 2014;73(6):1107-13. doi: 10.1136/annrheumdis-2012-203075
- 15 24. Baraliakos X, Haibel H, Listing J, et al. Continuous long-term anti-TNF therapy does not lead to an  
16 increase in the rate of new bone formation over 8 years in patients with ankylosing  
17 spondylitis. *Ann Rheum Dis* 2014;73(4):710-5. doi: 10.1136/annrheumdis-2012-202698
- 18 25. Haroon N, Inman RD, Learch TJ, et al. The impact of tumor necrosis factor alpha inhibitors on  
19 radiographic progression in ankylosing spondylitis. *Arthritis Rheum* 2013;65(10):2645-54. doi:  
20 10.1002/art.38070
- 21 26. Maksymowych WP, Zheng Y, Wichuk S, et al. The Effect of TNF Inhibition on Radiographic  
22 Progression in Ankylosing Spondylitis: An Observational Cohort Study of 374 Patients  
23 [abstract]. *Arthritis Rheumatol* 2015;67(suppl 10):1275-76.
- 24 27. Gensler L, Reveille J, Lee M, et al. High Dose Nonsteroidal Anti-Inflammatory Drugs (NSAIDs) and  
25 Tumor Necrosis Factor Inhibitor Use Results in Less Radiographic Progression in Ankylosing  
26 Spondylitis – a Longitudinal Analysis [abstract]. *Arthritis Rheumatol* 2016;68(Suppl. 10):2481-  
27 82.
- 28 28. Creemers MC, Franssen MJ, van't Hof MA, et al. Assessment of outcome in ankylosing spondylitis:  
29 an extended radiographic scoring system. *Ann Rheum Dis* 2005;64(1):127-9. doi:  
30 10.1136/ard.2004.020503
- 31 29. van der Linden S, Valkenburg HA, Cats A. Evaluation of diagnostic criteria for ankylosing  
32 spondylitis. A proposal for modification of the New York criteria. *Arthritis Rheum*  
33 1984;27(4):361-8.
- 34  
35  
36  
37  
38  
39  
40  
41  
42  
43  
44  
45  
46  
47  
48  
49  
50  
51  
52  
53  
54  
55  
56  
57  
58  
59  
60



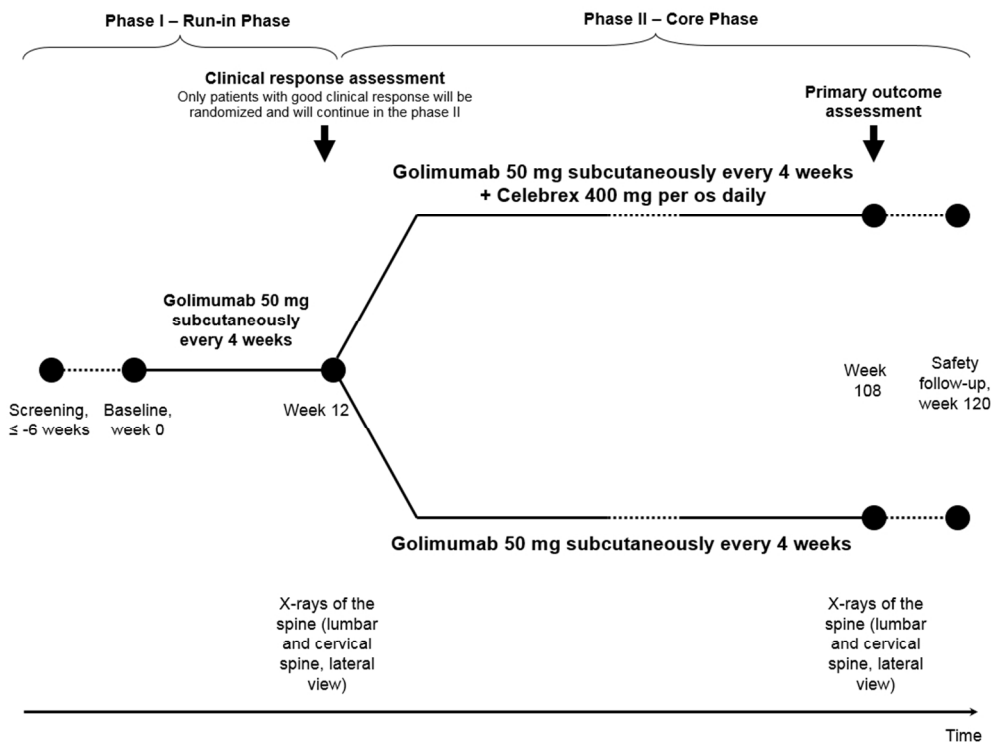

Figure 1: Study design.  
Figure 1  
92x69mm (300 x 300 DPI)

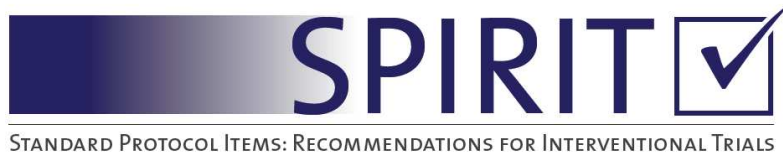

SPIRIT 2013 Checklist: Recommended items to address in a clinical trial protocol and related documents\*

| Section/item                      | Item No | Description                                                                                                                                                                                                                                                                              | Addressed on page number                                                                                      |
|-----------------------------------|---------|------------------------------------------------------------------------------------------------------------------------------------------------------------------------------------------------------------------------------------------------------------------------------------------|---------------------------------------------------------------------------------------------------------------|
| <b>Administrative information</b> |         |                                                                                                                                                                                                                                                                                          |                                                                                                               |
| Title                             | 1       | Descriptive title identifying the study design, population, interventions, and, if applicable, trial acronym                                                                                                                                                                             | 1 of 61                                                                                                       |
| Trial registration                | 2a      | Trial identifier and registry name. If not yet registered, name of intended registry                                                                                                                                                                                                     | <a href="https://clinicaltrials.gov/ct2/show/NCT02758782">https://clinicaltrials.gov/ct2/show/NCT02758782</a> |
|                                   | 2b      | All items from the World Health Organization Trial Registration Data Set                                                                                                                                                                                                                 | yes                                                                                                           |
| Protocol version                  | 3       | Date and version identifier                                                                                                                                                                                                                                                              | 1 of 61                                                                                                       |
| Funding                           | 4       | Sources and types of financial, material, and other support                                                                                                                                                                                                                              | 12 of 61                                                                                                      |
| Roles and responsibilities        | 5a      | Names, affiliations, and roles of protocol contributors                                                                                                                                                                                                                                  | 1 of 61                                                                                                       |
|                                   | 5b      | Name and contact information for the trial sponsor                                                                                                                                                                                                                                       | 1 of 61                                                                                                       |
|                                   | 5c      | Role of study sponsor and funders, if any, in study design; collection, management, analysis, and interpretation of data; writing of the report; and the decision to submit the report for publication, including whether they will have ultimate authority over any of these activities | N/A                                                                                                           |

|                                                 |    |                                                                                                                                                                                                                                                                  |     |
|-------------------------------------------------|----|------------------------------------------------------------------------------------------------------------------------------------------------------------------------------------------------------------------------------------------------------------------|-----|
| 1<br>2<br>3<br>4<br>5<br>6<br>7<br>8<br>9<br>10 | 5d | Composition, roles, and responsibilities of the coordinating centre, steering committee, endpoint adjudication committee, data management team, and other individuals or groups overseeing the trial, if applicable (see Item 21a for data monitoring committee) | N/A |
|-------------------------------------------------|----|------------------------------------------------------------------------------------------------------------------------------------------------------------------------------------------------------------------------------------------------------------------|-----|

## Introduction

|                                                                            |                          |    |                                                                                                                                                                                                           |             |
|----------------------------------------------------------------------------|--------------------------|----|-----------------------------------------------------------------------------------------------------------------------------------------------------------------------------------------------------------|-------------|
| 11<br>12<br>13<br>14<br>15<br>16<br>17<br>18<br>19<br>20<br>21<br>22<br>23 | Background and rationale | 6a | Description of research question and justification for undertaking the trial, including summary of relevant studies (published and unpublished) examining benefits and harms for each intervention        | 15-17 of 61 |
|                                                                            |                          | 6b | Explanation for choice of comparators                                                                                                                                                                     | 20-21 of 61 |
|                                                                            | Objectives               | 7  | Specific objectives or hypotheses                                                                                                                                                                         | 18-19 of 61 |
|                                                                            | Trial design             | 8  | Description of trial design including type of trial (eg, parallel group, crossover, factorial, single group), allocation ratio, and framework (eg, superiority, equivalence, noninferiority, exploratory) | 20-35 of 61 |

## Methods: Participants, interventions, and outcomes

|                                                                                                                                  |                      |     |                                                                                                                                                                                                |                                                                                                               |
|----------------------------------------------------------------------------------------------------------------------------------|----------------------|-----|------------------------------------------------------------------------------------------------------------------------------------------------------------------------------------------------|---------------------------------------------------------------------------------------------------------------|
| 24<br>25<br>26<br>27<br>28<br>29<br>30<br>31<br>32<br>33<br>34<br>35<br>36<br>37<br>38<br>39<br>40<br>41<br>42<br>43<br>44<br>45 | Study setting        | 9   | Description of study settings (eg, community clinic, academic hospital) and list of countries where data will be collected. Reference to where list of study sites can be obtained             | <a href="https://clinicaltrials.gov/ct2/show/NCT02758782">https://clinicaltrials.gov/ct2/show/NCT02758782</a> |
|                                                                                                                                  | Eligibility criteria | 10  | Inclusion and exclusion criteria for participants. If applicable, eligibility criteria for study centres and individuals who will perform the interventions (eg, surgeons, psychotherapists)   | 23-26 of 61                                                                                                   |
|                                                                                                                                  | Interventions        | 11a | Interventions for each group with sufficient detail to allow replication, including how and when they will be administered                                                                     | 27-29 of 61                                                                                                   |
|                                                                                                                                  |                      | 11b | Criteria for discontinuing or modifying allocated interventions for a given trial participant (eg, drug dose change in response to harms, participant request, or improving/worsening disease) | 30 of 61                                                                                                      |
|                                                                                                                                  |                      | 11c | Strategies to improve adherence to intervention protocols, and any procedures for monitoring adherence (eg, drug tablet return, laboratory tests)                                              | 30 of 61                                                                                                      |

|    |                                                                     |     |                                                                                                                                                                                                                                                                                                                                                                                |             |
|----|---------------------------------------------------------------------|-----|--------------------------------------------------------------------------------------------------------------------------------------------------------------------------------------------------------------------------------------------------------------------------------------------------------------------------------------------------------------------------------|-------------|
| 1  |                                                                     |     |                                                                                                                                                                                                                                                                                                                                                                                |             |
| 2  |                                                                     |     |                                                                                                                                                                                                                                                                                                                                                                                |             |
| 3  |                                                                     | 11d | Relevant concomitant care and interventions that are permitted or prohibited during the trial                                                                                                                                                                                                                                                                                  | 27 of 61    |
| 4  | Outcomes                                                            | 12  | Primary, secondary, and other outcomes, including the specific measurement variable (eg, systolic blood pressure), analysis metric (eg, change from baseline, final value, time to event), method of aggregation (eg, median, proportion), and time point for each outcome. Explanation of the clinical relevance of chosen efficacy and harm outcomes is strongly recommended | 18-19 of 61 |
| 5  |                                                                     |     |                                                                                                                                                                                                                                                                                                                                                                                |             |
| 6  |                                                                     |     |                                                                                                                                                                                                                                                                                                                                                                                |             |
| 7  |                                                                     |     |                                                                                                                                                                                                                                                                                                                                                                                |             |
| 8  |                                                                     |     |                                                                                                                                                                                                                                                                                                                                                                                |             |
| 9  |                                                                     |     |                                                                                                                                                                                                                                                                                                                                                                                |             |
| 10 | Participant timeline                                                | 13  | Time schedule of enrolment, interventions (including any run-ins and washouts), assessments, and visits for participants. A schematic diagram is highly recommended (see Figure)                                                                                                                                                                                               | 20 of 61    |
| 11 |                                                                     |     |                                                                                                                                                                                                                                                                                                                                                                                |             |
| 12 |                                                                     |     |                                                                                                                                                                                                                                                                                                                                                                                |             |
| 13 | Sample size                                                         | 14  | Estimated number of participants needed to achieve study objectives and how it was determined, including clinical and statistical assumptions supporting any sample size calculations                                                                                                                                                                                          | 49-50 of 61 |
| 14 |                                                                     |     |                                                                                                                                                                                                                                                                                                                                                                                |             |
| 15 |                                                                     |     |                                                                                                                                                                                                                                                                                                                                                                                |             |
| 16 | Recruitment                                                         | 15  | Strategies for achieving adequate participant enrolment to reach target sample size                                                                                                                                                                                                                                                                                            | N/A         |
| 17 |                                                                     |     |                                                                                                                                                                                                                                                                                                                                                                                |             |
| 18 |                                                                     |     |                                                                                                                                                                                                                                                                                                                                                                                |             |
| 19 | <b>Methods: Assignment of interventions (for controlled trials)</b> |     |                                                                                                                                                                                                                                                                                                                                                                                |             |
| 20 | Allocation:                                                         |     |                                                                                                                                                                                                                                                                                                                                                                                |             |
| 21 |                                                                     |     |                                                                                                                                                                                                                                                                                                                                                                                |             |
| 22 | Sequence generation                                                 | 16a | Method of generating the allocation sequence (eg, computer-generated random numbers), and list of any factors for stratification. To reduce predictability of a random sequence, details of any planned restriction (eg, blocking) should be provided in a separate document that is unavailable to those who enrol participants or assign interventions                       | 49 of 61    |
| 23 |                                                                     |     |                                                                                                                                                                                                                                                                                                                                                                                |             |
| 24 |                                                                     |     |                                                                                                                                                                                                                                                                                                                                                                                |             |
| 25 |                                                                     |     |                                                                                                                                                                                                                                                                                                                                                                                |             |
| 26 |                                                                     |     |                                                                                                                                                                                                                                                                                                                                                                                |             |
| 27 |                                                                     |     |                                                                                                                                                                                                                                                                                                                                                                                |             |
| 28 | Allocation concealment mechanism                                    | 16b | Mechanism of implementing the allocation sequence (eg, central telephone; sequentially numbered, opaque, sealed envelopes), describing any steps to conceal the sequence until interventions are assigned                                                                                                                                                                      | 49 of 61    |
| 29 |                                                                     |     |                                                                                                                                                                                                                                                                                                                                                                                |             |
| 30 |                                                                     |     |                                                                                                                                                                                                                                                                                                                                                                                |             |
| 31 |                                                                     |     |                                                                                                                                                                                                                                                                                                                                                                                |             |
| 32 | Implementation                                                      | 16c | Who will generate the allocation sequence, who will enrol participants, and who will assign participants to interventions                                                                                                                                                                                                                                                      | 49 of 61    |
| 33 |                                                                     |     |                                                                                                                                                                                                                                                                                                                                                                                |             |
| 34 |                                                                     |     |                                                                                                                                                                                                                                                                                                                                                                                |             |
| 35 |                                                                     |     |                                                                                                                                                                                                                                                                                                                                                                                |             |
| 36 | Blinding (masking)                                                  | 17a | Who will be blinded after assignment to interventions (eg, trial participants, care providers, outcome assessors, data analysts), and how                                                                                                                                                                                                                                      | N/A         |
| 37 |                                                                     |     |                                                                                                                                                                                                                                                                                                                                                                                |             |
| 38 |                                                                     |     |                                                                                                                                                                                                                                                                                                                                                                                |             |
| 39 |                                                                     | 17b | If blinded, circumstances under which unblinding is permissible, and procedure for revealing a participant's allocated intervention during the trial                                                                                                                                                                                                                           | N/A         |
| 40 |                                                                     |     |                                                                                                                                                                                                                                                                                                                                                                                |             |
| 41 |                                                                     |     |                                                                                                                                                                                                                                                                                                                                                                                |             |
| 42 |                                                                     |     |                                                                                                                                                                                                                                                                                                                                                                                |             |
| 43 |                                                                     |     |                                                                                                                                                                                                                                                                                                                                                                                |             |
| 44 |                                                                     |     |                                                                                                                                                                                                                                                                                                                                                                                |             |
| 45 |                                                                     |     |                                                                                                                                                                                                                                                                                                                                                                                |             |
| 46 |                                                                     |     |                                                                                                                                                                                                                                                                                                                                                                                |             |
| 47 |                                                                     |     |                                                                                                                                                                                                                                                                                                                                                                                |             |
| 48 |                                                                     |     |                                                                                                                                                                                                                                                                                                                                                                                |             |
| 49 |                                                                     |     |                                                                                                                                                                                                                                                                                                                                                                                |             |

1  
2  
3 **Methods: Data collection, management, and analysis**  
4

|                        |     |                                                                                                                                                                                                                                                                                                                                                                                                              |                     |
|------------------------|-----|--------------------------------------------------------------------------------------------------------------------------------------------------------------------------------------------------------------------------------------------------------------------------------------------------------------------------------------------------------------------------------------------------------------|---------------------|
| 5 Data collection      | 18a | Plans for assessment and collection of outcome, baseline, and other trial data, including any related processes to promote data quality (eg, duplicate measurements, training of assessors) and a description of study instruments (eg, questionnaires, laboratory tests) along with their reliability and validity, if known. Reference to where data collection forms can be found, if not in the protocol | 13-14 of 61         |
| 6 methods              |     |                                                                                                                                                                                                                                                                                                                                                                                                              |                     |
| 7                      |     |                                                                                                                                                                                                                                                                                                                                                                                                              |                     |
| 8                      |     |                                                                                                                                                                                                                                                                                                                                                                                                              |                     |
| 9                      |     |                                                                                                                                                                                                                                                                                                                                                                                                              |                     |
| 10                     |     |                                                                                                                                                                                                                                                                                                                                                                                                              |                     |
| 11                     | 18b | Plans to promote participant retention and complete follow-up, including list of any outcome data to be collected for participants who discontinue or deviate from intervention protocols                                                                                                                                                                                                                    | 21, 31 and 35 of 61 |
| 12                     |     |                                                                                                                                                                                                                                                                                                                                                                                                              |                     |
| 13                     |     |                                                                                                                                                                                                                                                                                                                                                                                                              |                     |
| 14 Data management     | 19  | Plans for data entry, coding, security, and storage, including any related processes to promote data quality (eg, double data entry; range checks for data values). Reference to where details of data management procedures can be found, if not in the protocol                                                                                                                                            | 51-52 of 61         |
| 15                     |     |                                                                                                                                                                                                                                                                                                                                                                                                              |                     |
| 16                     |     |                                                                                                                                                                                                                                                                                                                                                                                                              |                     |
| 17                     |     |                                                                                                                                                                                                                                                                                                                                                                                                              |                     |
| 18 Statistical methods | 20a | Statistical methods for analysing primary and secondary outcomes. Reference to where other details of the statistical analysis plan can be found, if not in the protocol                                                                                                                                                                                                                                     | 46-53 of 61         |
| 19                     |     |                                                                                                                                                                                                                                                                                                                                                                                                              |                     |
| 20                     |     |                                                                                                                                                                                                                                                                                                                                                                                                              |                     |
| 21                     |     |                                                                                                                                                                                                                                                                                                                                                                                                              |                     |
| 22                     | 20b | Methods for any additional analyses (eg, subgroup and adjusted analyses)                                                                                                                                                                                                                                                                                                                                     | 48 of 61            |
| 23                     |     |                                                                                                                                                                                                                                                                                                                                                                                                              |                     |
| 24                     | 20c | Definition of analysis population relating to protocol non-adherence (eg, as randomised analysis), and any statistical methods to handle missing data (eg, multiple imputation)                                                                                                                                                                                                                              | 48 of 61            |
| 25                     |     |                                                                                                                                                                                                                                                                                                                                                                                                              |                     |
| 26                     |     |                                                                                                                                                                                                                                                                                                                                                                                                              |                     |

27 **Methods: Monitoring**  
28

|                    |     |                                                                                                                                                                                                                                                                                                                                       |                                                                                                               |
|--------------------|-----|---------------------------------------------------------------------------------------------------------------------------------------------------------------------------------------------------------------------------------------------------------------------------------------------------------------------------------------|---------------------------------------------------------------------------------------------------------------|
| 29 Data monitoring | 21a | Composition of data monitoring committee (DMC); summary of its role and reporting structure; statement of whether it is independent from the sponsor and competing interests; and reference to where further details about its charter can be found, if not in the protocol. Alternatively, an explanation of why a DMC is not needed | <a href="https://clinicaltrials.gov/ct2/show/NCT02758782">https://clinicaltrials.gov/ct2/show/NCT02758782</a> |
| 30                 |     |                                                                                                                                                                                                                                                                                                                                       |                                                                                                               |
| 31                 |     |                                                                                                                                                                                                                                                                                                                                       |                                                                                                               |
| 32                 |     |                                                                                                                                                                                                                                                                                                                                       |                                                                                                               |
| 33                 |     |                                                                                                                                                                                                                                                                                                                                       |                                                                                                               |
| 34                 |     |                                                                                                                                                                                                                                                                                                                                       |                                                                                                               |
| 35                 | 21b | Description of any interim analyses and stopping guidelines, including who will have access to these interim results and make the final decision to terminate the trial                                                                                                                                                               | 31-32 of 61                                                                                                   |
| 36                 |     |                                                                                                                                                                                                                                                                                                                                       |                                                                                                               |
| 37                 |     |                                                                                                                                                                                                                                                                                                                                       |                                                                                                               |
| 38 Harms           | 22  | Plans for collecting, assessing, reporting, and managing solicited and spontaneously reported adverse events and other unintended effects of trial interventions or trial conduct                                                                                                                                                     | 36-39 of 61                                                                                                   |
| 39                 |     |                                                                                                                                                                                                                                                                                                                                       |                                                                                                               |
| 40                 |     |                                                                                                                                                                                                                                                                                                                                       |                                                                                                               |
| 41 Auditing        | 23  | Frequency and procedures for auditing trial conduct, if any, and whether the process will be independent from investigators and the sponsor                                                                                                                                                                                           | 54 of 61                                                                                                      |
| 42                 |     |                                                                                                                                                                                                                                                                                                                                       |                                                                                                               |
| 43                 |     |                                                                                                                                                                                                                                                                                                                                       |                                                                                                               |
| 44                 |     |                                                                                                                                                                                                                                                                                                                                       |                                                                                                               |
| 45                 |     |                                                                                                                                                                                                                                                                                                                                       |                                                                                                               |

1  
2  
3  
4  
5  
6  
7  
8  
9  
10  
11  
12  
13  
14  
15  
16  
17  
18  
19  
20  
21  
22  
23  
24  
25  
26  
27  
28  
29  
30  
31  
32  
33  
34  
35  
36  
37  
38  
39  
40  
41  
42  
43  
44  
45  
46  
47  
48  
49**Ethics and dissemination**

|                               |     |                                                                                                                                                                                                                                                                                     |                                                                                                               |
|-------------------------------|-----|-------------------------------------------------------------------------------------------------------------------------------------------------------------------------------------------------------------------------------------------------------------------------------------|---------------------------------------------------------------------------------------------------------------|
| Research ethics approval      | 24  | Plans for seeking research ethics committee/institutional review board (REC/IRB) approval                                                                                                                                                                                           | 45 of 61                                                                                                      |
| Protocol amendments           | 25  | Plans for communicating important protocol modifications (eg, changes to eligibility criteria, outcomes, analyses) to relevant parties (eg, investigators, REC/IRBs, trial participants, trial registries, journals, regulators)                                                    | 46 of 61                                                                                                      |
| Consent or assent             | 26a | Who will obtain informed consent or assent from potential trial participants or authorised surrogates, and how (see Item 32)                                                                                                                                                        | IRB                                                                                                           |
|                               | 26b | Additional consent provisions for collection and use of participant data and biological specimens in ancillary studies, if applicable                                                                                                                                               | N/A                                                                                                           |
| Confidentiality               | 27  | How personal information about potential and enrolled participants will be collected, shared, and maintained in order to protect confidentiality before, during, and after the trial                                                                                                | 55                                                                                                            |
| Declaration of interests      | 28  | Financial and other competing interests for principal investigators for the overall trial and each study site                                                                                                                                                                       | N/A                                                                                                           |
| Access to data                | 29  | Statement of who will have access to the final trial dataset, and disclosure of contractual agreements that limit such access for investigators                                                                                                                                     | PI, SI and Study biostatistician                                                                              |
| Ancillary and post-trial care | 30  | Provisions, if any, for ancillary and post-trial care, and for compensation to those who suffer harm from trial participation                                                                                                                                                       | 44 of 61                                                                                                      |
| Dissemination policy          | 31a | Plans for investigators and sponsor to communicate trial results to participants, healthcare professionals, the public, and other relevant groups (eg, via publication, reporting in results databases, or other data sharing arrangements), including any publication restrictions | <a href="https://clinicaltrials.gov/ct2/show/NCT02758782">https://clinicaltrials.gov/ct2/show/NCT02758782</a> |
|                               | 31b | Authorship eligibility guidelines and any intended use of professional writers                                                                                                                                                                                                      | N/A                                                                                                           |
|                               | 31c | Plans, if any, for granting public access to the full protocol, participant-level dataset, and statistical code                                                                                                                                                                     | <a href="https://clinicaltrials.gov/ct2/show/NCT02758782">https://clinicaltrials.gov/ct2/show/NCT02758782</a> |

**Appendices**

|                            |    |                                                                                                                                                                                                |     |
|----------------------------|----|------------------------------------------------------------------------------------------------------------------------------------------------------------------------------------------------|-----|
| Informed consent materials | 32 | Model consent form and other related documentation given to participants and authorised surrogates                                                                                             | N/A |
| Biological specimens       | 33 | Plans for collection, laboratory evaluation, and storage of biological specimens for genetic or molecular analysis in the current trial and for future use in ancillary studies, if applicable | N/A |

\*It is strongly recommended that this checklist be read in conjunction with the SPIRIT 2013 Explanation & Elaboration for important clarification on the items. Amendments to the protocol should be tracked and dated. The SPIRIT checklist is copyrighted by the SPIRIT Group under the Creative Commons "[Attribution-NonCommercial-NoDerivs 3.0 Unported](#)" license.

Peer review only

# BMJ Open

**Study protocol: Comparison of the effect of treatment with NSAIDs added to anti-TNF therapy versus anti-TNF therapy alone on progression of structural damage in the spine over two years in patients with ankylosing spondylitis – an open-label randomized controlled multi-centre trial**

|                                 |                                                                                                                                                                                                                                                                                                                                                                                                                                                                                                                                                                                                                                                                                                                                                                                                                                                                                  |
|---------------------------------|----------------------------------------------------------------------------------------------------------------------------------------------------------------------------------------------------------------------------------------------------------------------------------------------------------------------------------------------------------------------------------------------------------------------------------------------------------------------------------------------------------------------------------------------------------------------------------------------------------------------------------------------------------------------------------------------------------------------------------------------------------------------------------------------------------------------------------------------------------------------------------|
| Journal:                        | <i>BMJ Open</i>                                                                                                                                                                                                                                                                                                                                                                                                                                                                                                                                                                                                                                                                                                                                                                                                                                                                  |
| Manuscript ID                   | bmjopen-2016-014591.R2                                                                                                                                                                                                                                                                                                                                                                                                                                                                                                                                                                                                                                                                                                                                                                                                                                                           |
| Article Type:                   | Protocol                                                                                                                                                                                                                                                                                                                                                                                                                                                                                                                                                                                                                                                                                                                                                                                                                                                                         |
| Date Submitted by the Author:   | 06-Mar-2017                                                                                                                                                                                                                                                                                                                                                                                                                                                                                                                                                                                                                                                                                                                                                                                                                                                                      |
| Complete List of Authors:       | Proft, Fabian; Department of Gastroenterology, Infectiology and Rheumatology, Campus Benjamin Franklin, Charité Universitätsmedizin Berlin, Rheumatology<br>Muche, Burkhard; Department of Gastroenterology, Infectiology and Rheumatology, Campus Benjamin Franklin, Charité Universitätsmedizin Berlin, Rheumatology<br>Listing, Joachim; German Rheumatism Research Centre<br>Rios-Rodriguez, Valeria; Department of Gastroenterology, Infectiology and Rheumatology, Campus Benjamin Franklin, Charité Universitätsmedizin Berlin, Rheumatology<br>Sieper, Joachim; Department of Gastroenterology, Infectiology and Rheumatology, Campus Benjamin Franklin, Charité Universitätsmedizin Berlin, Rheumatology<br>Poddubnyy, Denis; Department of Gastroenterology, Infectiology and Rheumatology, Campus Benjamin Franklin, Charité Universitätsmedizin Berlin, Rheumatology |
| <b>Primary Subject Heading</b>: | Rheumatology                                                                                                                                                                                                                                                                                                                                                                                                                                                                                                                                                                                                                                                                                                                                                                                                                                                                     |
| Secondary Subject Heading:      | Radiology and imaging                                                                                                                                                                                                                                                                                                                                                                                                                                                                                                                                                                                                                                                                                                                                                                                                                                                            |
| Keywords:                       | Ankylosing spondylitis, radiographic progression, TNF inhibitors, NSAIDs, mSASS                                                                                                                                                                                                                                                                                                                                                                                                                                                                                                                                                                                                                                                                                                                                                                                                  |
|                                 |                                                                                                                                                                                                                                                                                                                                                                                                                                                                                                                                                                                                                                                                                                                                                                                                                                                                                  |

SCHOLARONE™  
Manuscripts



1  
2  
3 **Study protocol: Comparison of the effect of treatment with NSAIDs**  
4 **added to anti-TNF therapy versus anti-TNF therapy alone on**  
5 **progression of structural damage in the spine over two years in**  
6 **patients with ankylosing spondylitis – an open-label randomized**  
7 **controlled multi-centre trial**  
8  
9  
10  
11  
12  
13

14 Fabian Profft<sup>1</sup>, Burkhard Muche<sup>1</sup>, Joachim Listing<sup>2</sup>, Valeria Rios Rodriguez<sup>1</sup>, Joachim  
15 Sieper<sup>1</sup>, Denis Poddubnyy<sup>1</sup>  
16  
17  
18

19 <sup>1</sup>Department of Gastroenterology, Infectiology and Rheumatology, Campus Benjamin  
20 Franklin, Charité Universitätsmedizin Berlin, Berlin, Germany  
21  
22

23 <sup>2</sup>German Rheumatism Research Centre, Berlin, Germany  
24  
25

26 **Corresponding author:** Prof. Dr. Denis Poddubnyy  
27

28 Department of Gastroenterology, Infectiology and Rheumatology  
29

30 Campus Benjamin Franklin  
31

32 Charité Universitätsmedizin Berlin  
33

34 Hindenburgdamm 30  
35

36 12203 Berlin, Germany  
37

38 Phone: +49 30 450 514 544  
39

40 Fax: +49 30 450 7 514 915  
41

42 E-mail: [denis.poddubnyy@charite.de](mailto:denis.poddubnyy@charite.de)  
43  
44  
45  
46  
47  
48  
49  
50  
51  
52  
53  
54  
55  
56  
57  
58  
59  
60

## Article summary

**Introduction:** There is some evidence that non-steroidal anti-inflammatory drugs (NSAIDs), in particular Celecoxib, might possess not only a symptomatic efficacy but also disease modifying properties in ankylosing spondylitis (AS), retarding the progression of structural damage in the spine if taken continuously. In contrast, this remains controversial for tumour necrosis factor (TNF)  $\alpha$  inhibitors, despite their good clinical efficacy. The impact of a combined therapy (a TNF inhibitor plus an NSAID) on radiographic spinal progression in AS is unclear.

**Methods and analysis:** The aim of this study is to evaluate the impact of treatment with an NSAID (Celecoxib) when added to a TNF inhibitor (Golimumab) as compared to TNF inhibitor (Golimumab) alone on progression of structural damage in the spine over two years in patients with AS. The study consists of a 6-week screening period, a 12-week period (Phase I: Run-in Phase) of treatment with Golimumab for all subjects followed by a 96-week controlled treatment period (Phase II: Core Phase) with Golimumab plus Celecoxib versus Golimumab alone, and a safety follow-up period of 4 weeks. At week 108 the primary study endpoint radiographic spinal progression (as assessed by the change in the modified Stoke Ankylosing Spondylitis Spine Score – mSASSS after two years) will be evaluated.

**Ethics and dissemination:** The study will be performed according to the principles of good clinical practice (GCP) and the German drug law. The written approval of the independent ethics committee and of the German federal authority have been obtained. Upon study completion, results are expected to be published in a peer-reviewed journal.

**Registration details:** ClinicalTrials.gov ID: NCT02758782, EudraCT Number: 2016-000615-33.

**Funding:** This work is supported by the German Federal Ministry of Education and Research (BMBF), Grant-No. FKZ 01KG1603. MSD Sharp & Dohme GmbH provides the study drug Golimumab and financial support of the MRI sub-study.

## Strengths and limitations of this study

### *Strengths:*

- This is the first prospective randomized controlled multi-centre trial with the objective to investigate the effect of a combination of a TNF inhibitor with an NSAID on radiographic spinal progression in ankylosing spondylitis.
- The primary outcome measure (radiographic spinal progression) will be evaluated by two independent readers blinded for the time-point and all clinical data including treatment allocation, and is therefore, not affected by the open-label study design.
- Patient population consists of patients at high risk of radiographic spinal progression.

### *Limitations:*

- Study is conducted only in one country (Germany).
- The intervention is not masked / blinded.
- Highly selected patient population.
- Assumptions made for the sample size calculation are based on data obtained separately for TNF inhibitors and NSAIDs.

## Introduction

Ankylosing spondylitis (AS) is a chronic inflammatory disease of unknown aetiology with primary involvement of the axial skeleton (sacroiliac joint (SIJ) and spine), starting in most of the cases in subjects under 45 years of age (mean age onset about 26 years), with a strong association with the MHC class I antigen HLA-B27, which is positive in 80-90% of the patients<sup>1</sup>. AS patients can develop peripheral arthritis and enthesitis, as well as extra-articular manifestations such as anterior uveitis, psoriasis and inflammatory bowel disease<sup>2</sup>. The prevalence of AS is estimated to be between 0.1 and 1.4%<sup>3</sup>. The disease is characterized by the presence of active inflammation in the SIJ and the spine, which manifests as pain and stiffness, and by excessive new bone formation (leading to the development of syndesmophytes and ankylosis in the same areas). This results in a significant functional impairment in up to 40% of the patients<sup>4 5</sup>. Given the young age at disease onset in the majority of patients, impairment of the functional status in AS causing disability has a relevant socio-economic impact<sup>6</sup>. Reduction of clinical burden and prevention of disability can probably be best achieved by early and adequate treatment targeting both inflammation and new bone formation. According to the Assessment of SpondyloArthritis international Society (ASAS) and European League Against Rheumatism (EULAR) recommendations, the first-line therapy for patients with AS are nonsteroidal anti-inflammatory drugs (NSAIDs), including selective cyclooxygenase-2 (COX-2) antagonists, along with education and continuous exercise/physiotherapy<sup>7</sup>. Therapy with conventional disease-modifying anti-rheumatic drugs (DMARDs) such as sulfasalazine or methotrexate may have some beneficial effect in patients with peripheral joint involvement, but in general is not effective for the treatment of axial involvement<sup>8-10</sup>. For those patients who have a poor response to NSAIDs, contraindications or intolerance for NSAIDs, the only effective treatment currently available is the therapy with tumour necrosis factor (TNF)  $\alpha$  inhibitors<sup>7</sup> or with a recently introduced monoclonal antibody against interleukin (IL)-17 secukinumab<sup>11</sup>. There is some evidence that NSAIDs, in particular Celecoxib, might possess not only a symptomatic efficacy but also disease modifying properties in AS, retarding the progression of structural damage (syndesmophytes and ankylosis) in the spine if taken continuously<sup>12</sup>. This might be explained by a direct inhibitory effect on osteoblast genesis and activity<sup>13</sup>. This effect was especially evident in AS patients with elevated C-reactive protein (CRP)<sup>14</sup>, which is also considered a risk factor for

1  
2  
3 radiographic spinal progression in AS<sup>15</sup>. The data from the German Spondyloarthritis  
4 Inception Cohort (GESPIC) showed a similar protective effect against radiographic  
5 spinal progression in those patients who had high NSAIDs intake (defined as >50%  
6 of the maximum recommended dose) and who were at high risk for radiographic  
7 spinal progression (due to presence of syndesmophytes and/or elevated CRP) at  
8 baseline<sup>16</sup>. For diclofenac, a nonselective COX inhibitor, such effect was, however,  
9 not proven in a recently published trial<sup>17</sup>.

10  
11  
12  
13  
14  
15 The data on the effect of TNF inhibitors on radiographic spinal progression in  
16 ankylosing spondylitis – despite their high anti-inflammatory efficacy – remains  
17 controversial. While some studies could not show a retardation of radiographic spinal  
18 progression in AS over a period of two<sup>18-20</sup> or four<sup>21</sup> years, there are three  
19 observational studies suggesting that it may take more than four years to detect such  
20 an effect<sup>22-24</sup> and that early (within the first five or ten years of the disease) initiation  
21 of anti-TNF therapy might play a key role<sup>23 24</sup>. However, no prospective controlled  
22 trials have been conducted so far to confirm these observations.

23  
24  
25  
26  
27  
28  
29 Many patients with AS treated with a TNF inhibitor discontinue their NSAIDs due to  
30 good symptom control<sup>25</sup>. Therefore, it has not been possible until now to answer the  
31 question of the impact of a combined therapy (TNF inhibitor and NSAID) on  
32 radiographic spinal progression. It is crucial to clarify whether adding an NSAID  
33 (especially a COX-2 selective one) to TNF inhibitor treatment is able to stop or  
34 reduce radiographic progression, especially in patients at high risk (i.e. with elevated  
35 CRP and/or with already present syndesmophytes). Recently, results of an  
36 observational study indicating inhibition of radiographic spinal progression with a  
37 combination of a TNF inhibitor with a high dose NSAID were presented<sup>26</sup> stressing a  
38 need for a prospective interventional trial.

39  
40  
41  
42  
43  
44  
45  
46 The aim of this prospective study is to evaluate the impact of treatment with an  
47 NSAID Celecoxib added to a TNF inhibitor Golimumab as compared to Golimumab  
48 alone on progression of structural damage in the spine over two years in patients with  
49 AS.  
50  
51

## 52 53 54 55 **Methods and analysis:**

56  
57 *Study design.* This study is a randomized, controlled, multi-centre, open-label clinical  
58 trial. The study consists of a 6-week screening period, a 12-week period (Phase I:  
59  
60

1  
2  
3 Run-in Phase) of treatment with Golimumab 50 mg subcutaneously (sc) every four  
4 weeks for all subjects followed by a 96-week controlled treatment period (Phase II:  
5 Core-Phase) with Golimumab plus Celecoxib versus Golimumab alone, and a safety  
6 follow-up period of 4 weeks (**figure 1**). Only subjects with a good clinical response to  
7 Golimumab in the Phase I (improvement of the Bath Ankylosing Spondylitis Disease  
8 Activity Index (BASDAI) score by  $\geq 2$  absolute points on a 0-10 scale response at  
9 Week 12) will be eligible for Phase II and will be randomized based on a 1:1 ratio to  
10 receive Golimumab 50 mg sc every four weeks plus Celecoxib (in a daily dose of 400  
11 mg per day) or Golimumab 50 mg sc every four weeks alone for another 96 weeks.  
12 At week 108 the primary study endpoint (radiographic spinal progression defined as  
13 the change in the modified Stoke Ankylosing Spondylitis Spine Score – mSASSS<sup>27</sup>  
14 after two years) will be evaluated. Magnetic resonance imaging (MRI) of the spine  
15 and sacroiliac joints will be performed at baseline (Week 0), and at Week 108 (or in  
16 case of early termination (ET) at Week 84 or later) in a sub-study of approximately 60  
17 patients with no contraindication for this investigation.

18  
19  
20  
21  
22  
23  
24  
25  
26  
27  
28 *Patients.* Included Patients will be 18 years and older with AS fulfilling the modified  
29 New York Criteria<sup>28</sup> with an active disease (BASDAI  $\geq 4$ ), history of an inadequate  
30 response to at least two NSAIDs and at least one of the two following risk factors for  
31 radiographic spinal progression: elevated CRP or already present syndesmophyte(s)  
32 at screening, and give written informed consent. Key inclusion and exclusion criteria  
33 are shown in **table 1**. Study participants will be recruited from 21 rheumatologic  
34 centres throughout Germany between September 2016 and presumably February  
35 2018. 190 patients shall be assessed for eligibility (assuming a 10% screening failure  
36 rate), so that 170 patients with active AS despite treatment with NSAIDs alone will be  
37 included in the phase I of the trial and treated with Golimumab. Only patients with  
38 good clinical response (BASDAI reduction by  $\geq 2$  absolute points (on a 0-10 scale)  
39 after 12 weeks of Golimumab treatment will be enrolled in the phase II (Core Phase)  
40 of the trial. Based on the efficacy results from a phase-III study with Golimumab in  
41 AS<sup>29</sup>, we assume that approximately 60% (n=100) of the patients included in phase I  
42 will continue in to phase II of the study. Thus, 100 patients (n=50 in each group) will  
43 enter phase II of the trial (intention-to-treat population - ITT) after 1:1 randomization  
44 and will be analysed for the primary and secondary outcome parameters.

45  
46  
47  
48  
49  
50  
51  
52  
53  
54  
55  
56  
57 *Outcome parameters.* The study outcome parameters are summarized in table 2.  
58 The primary outcome parameter of the study is radiographic spinal progression  
59  
60

1  
2  
3 measured by the change in the modified Stoke Ankylosing Spondylitis Spine Score  
4 (mSASSS) after two years of treatment (primary endpoint). Secondary outcome  
5 parameters include new syndesmophyte formation or progression of existing  
6 syndesmophytes after two years of treatment, change of the bone and cartilage  
7 biomarkers serum levels change of the enteric microbiome profile, change of osteitis  
8 score and scores for the chronic post-inflammatory changes in the spine and  
9 sacroiliac joints on MRI by Berlin MRI scoring method (in the MRI sub-study only)  
10 and improvement of disease activity, function, axial mobility and quality of life. Safety  
11 outcome parameters include evaluation of adverse events (AEs), serious AE and  
12 AEs of interest: infections, malignancies, gastrointestinal events (ulceration, bleeding,  
13 perforation, gastric outlet obstruction), cardiovascular events (myocardial infarction,  
14 stroke, pulmonary artery embolism, peripheral arterial or venous thrombosis), renal  
15 impairment (creatinine >1.8 mg/dl or increase >0.5 mg/dl vs. baseline) and  
16 substantial (>5-fold) liver enzyme elevation.  
17

18  
19  
20  
21  
22  
23  
24  
25  
26  
27 *Data analysis plan.* The study consists of a 12-week run-in period, 96-week core  
28 period (randomized treatment) and 4-week follow-up period. The primary efficacy  
29 endpoint will be the absolute progression of the mSASSS score after two years of  
30 therapy in both treatment groups. The primary analysis will be based on the mean of  
31 the mSASSS scores obtained by 2 trained readers for the spinal X-rays performed at  
32 inclusion in the study and at Week 108 in the ITT population. For the purposes of the  
33 efficacy and safety analysis, a database lock will occur, once all data up to week 112  
34 has been collected and cleaned.  
35  
36  
37  
38  
39

40  
41  
42  
43  
44  
45  
46  
47  
48  
49  
50  
51  
52  
53  
54  
55  
56  
57  
58  
59  
60  
*Statistical analysis.* The primary analysis will be based on all patients who entered  
phase II of the trial (ITT population). Multiple imputation methods with mSASSS score  
at baseline as covariate will be applied to deal with missing radiographs in the  
primary analysis. The Mann-Whitney test will be used to compare the primary  
outcome (change in the mSASSS score) between the treatment groups. Cumulative  
probability plots will be built to visualise the finding. In a secondary analysis the  
Mann-Whitney test will be used to compare radiographic progression in the subgroup  
of patients with complete sets of radiographs. A likelihood approach will be applied to  
deal with missing data in secondary outcome parameters assessed at multiple time  
points. For that reason, linear mixed models will be applied to compare means of  
secondary outcome parameters over time. A non-responder imputation for missing

1  
2  
3 response data and chi-square tests will additionally be applied to compare response  
4 rates. Two-sided p values < 0.05 will be considered to be statistically significant.

5  
6 *Sample Size Justification.* The sample size calculation is based on the findings of  
7 Kroon et al.<sup>14</sup> our own results from GESPIC Cohort<sup>16</sup>, and those of Braun et al<sup>21</sup>. We  
8 assume a worsening in the mSASSS score of 1.7±2.8 in patients of the control group  
9 and of 0.2±1.6 in patients with continuous NSAIDs intake. We considered such a  
10 difference of 1.5 mSASSS units as clinically relevant and planned the sample size of  
11 this study by means of a two-sided ( $\alpha=0.05$ ) Welch-Satterthwaite t-test accordingly.  
12 To detect the mentioned difference with an 80% power, the sample size of n=38 in  
13 each group is needed in the phase II of the trial. This is also true if the Mann-Whitney  
14 test is applied. However, the power will decrease by the application of multiple  
15 imputations to deal with missing radiographs of dropouts in the ITT population.  
16 Considering that all subjects enrolled in the phase II will be responders to Golimumab  
17 therapy receiving this same treatment for the whole period of the trial, along with our  
18 experience in conducting randomized controlled trials, we presume dropout rates of  
19 less than 20% during phase II. For this reason and based on our own mSASSS data,  
20 we expect an increase in the variance of mSASSS progression because of multiple  
21 imputation by less than 25%. Considering this possible increase, a sample size of  
22 n=100 patients is needed for phase II of the trial to detect the expected and clinically  
23 relevant difference of an average 1.5 mSASSS points with an 80% power in the ITT  
24 population. In addition we assumed that 60% of the subjects enrolled in phase I of  
25 the study would be eligible for randomization and participation in phase II (based on  
26 the rate of the BASDAI50 response in AS patients with elevated CRP), giving a total  
27 n=170 subjects to be included in the phase I of the trial.

#### 28 29 30 31 32 33 34 35 36 37 38 39 40 41 42 43 44 **Ethics and dissemination:**

45 The study will be performed according to the International Conference of  
46 Harmonisation Good Clinical Practice (ICH / GCP) guidelines and the German drug  
47 law (Arzneimittelgesetz – AMG). The written approval of the central independent  
48 ethics committee (Ethics Committee of the Federal State Berlin), of the German  
49 federal authority (Paul-Ehrlich-Institut – PEI, Langen, Germany) and of the local  
50 ethics committees of the study centres have been obtained. Upon study completion,  
51 results are expected to be published in a peer-reviewed journal.

#### 52 53 54 55 56 57 58 **Registration details:**



1  
2  
3 The study has been registered in the ClinicalTrials.gov register (registration ID:  
4 NCT02758782) and in the European Union Clinical Trials Register (EudraCT  
5 Number: 2016-000615-33).  
6  
7

### 8 **Author's contribution.**

9  
10 Fabian Proft (FP), Burkard Muche (BM) and Valeria Rios Rodriguez (VRR) were  
11 involved in drafting the study protocol. Joachim Listing (JL) was involved in statistical  
12 planning and drafting the study protocol. Joachim Sieper (JS) developed the idea for  
13 this trial and was involved in drafting and revising the study protocol. Denis  
14 Poddubnyy (DP) conceived the idea for this trial, was involved in drafting and revising  
15 the study protocol and is the principal investigator of this trial.  
16  
17  
18  
19

### 20 **Funding.**

21 This work is supported by the German Federal Ministry of Education and Research  
22 (Bundesministerium für Bildung und Forschung - BMBF), Grant No: FKZ 01KG1603.  
23 MSD Sharp & Dohme GmbH provides study drug Golimumab and supports the MRI  
24 sub-study.  
25  
26  
27  
28

### 29 **Competing interests.**

30 FP: speaker fees and/or consultancy payments from Novartis, UCB and Roche.  
31

32 BM: consultancy payments from Novartis and UCB.  
33

34 JL: honoraria from Novartis and Pfizer.  
35

36 VRR: none.  
37

38 JS: research grants from Abbvie, Bristol Myers Squibb, Janssen, MSD, Pfizer, and  
39 Roche; speaker fees and/or consultancy payments from Abbvie, Bristol Myers  
40 Squibb, Janssen, Eli Lilly, MSD / Merck, Novartis, Pfizer, Roche, and UCB  
41

42 DP: research grants from Abbvie, MSD, and Novartis; speaker fees and/or  
43 consultancy payments from Abbvie, Bristol Myers Squibb, Janssen, Eli Lilly, MSD /  
44 Merck, Novartis, Pfizer, Roche, and UCB.  
45  
46  
47  
48  
49  
50  
51  
52  
53  
54  
55  
56  
57  
58  
59  
60

1  
2  
3 **Figure legend.**  
4

5  
6 **Figure 1:** Design of the COmparison of the effect of treatment with NSAIDs added to  
7 anti-TNF therapy versus anti-TNF therapy alone on progression of StrUctural  
8 damage in the spine over two years in patients with ankylosing spondylitis (CONSUL)  
9 study.  
10  
11  
12  
13  
14  
15  
16  
17  
18  
19  
20  
21  
22  
23  
24  
25  
26  
27  
28  
29  
30  
31  
32  
33  
34  
35  
36  
37  
38  
39  
40  
41  
42  
43  
44  
45  
46  
47  
48  
49  
50  
51  
52  
53  
54  
55  
56  
57  
58  
59  
60

| Inclusion criteria                                                                                                 | Exclusion criteria                                                    |
|--------------------------------------------------------------------------------------------------------------------|-----------------------------------------------------------------------|
| Age $\geq$ 18 years                                                                                                | Presence of total spinal ankylosis                                    |
| Definite diagnosis of AS according to the modified New York criteria                                               | History of primary non-response to previous anti-TNF therapy (if any) |
| Active disease (defined as BASDAI $\geq$ 4)                                                                        | Contraindications for the treatment with Golimumab and/or Celecoxib   |
| History of an inadequate response to a therapeutic trials of at least two NSAIDs                                   |                                                                       |
| Risk factors for radiographic spinal progression (defined as elevated CRP or existing syndesmophytes) at screening |                                                                       |

Table 1: Main inclusion and exclusion criteria of the CONSUL study.

Table 2: Main outcome parameters of the CONSUL study.

| Efficacy:                                                                                                                                                                                                                                                                                                                                                                                                                                                                                                                                                                                                                                                                                                                                                                                                                                                                                                                                                                                                                                                                                                                                                                                                                                                                                                                                                                                                                                                                                                                                                                                                                                                                                                                                                                                                                                                                                                                                                                                                                                                                   | Safety:                                                                   |
|-----------------------------------------------------------------------------------------------------------------------------------------------------------------------------------------------------------------------------------------------------------------------------------------------------------------------------------------------------------------------------------------------------------------------------------------------------------------------------------------------------------------------------------------------------------------------------------------------------------------------------------------------------------------------------------------------------------------------------------------------------------------------------------------------------------------------------------------------------------------------------------------------------------------------------------------------------------------------------------------------------------------------------------------------------------------------------------------------------------------------------------------------------------------------------------------------------------------------------------------------------------------------------------------------------------------------------------------------------------------------------------------------------------------------------------------------------------------------------------------------------------------------------------------------------------------------------------------------------------------------------------------------------------------------------------------------------------------------------------------------------------------------------------------------------------------------------------------------------------------------------------------------------------------------------------------------------------------------------------------------------------------------------------------------------------------------------|---------------------------------------------------------------------------|
| <p><i>Primary endpoint:</i></p> <ul style="list-style-type: none"> <li>• Radiographic spinal progression measured by the change in the modified Stoke Ankylosing Spondylitis Spine Score (mSASSS) after 2 years of treatment.</li> </ul> <p><i>Secondary endpoints:</i></p> <ul style="list-style-type: none"> <li>• New syndesmophyte formation or progression of existing syndesmophytes after 2 years of treatment.</li> <li>• Improvement of disease activity, function, axial mobility and quality of life measures at week 12 and week 108 in comparison to baseline according to:               <ul style="list-style-type: none"> <li>– Bath Ankylosing Spondylitis Disease Activity Index (BASDAI)</li> <li>– Ankylosing Spondylitis Disease Activity Score (ASDAS)</li> <li>– C-reactive protein (CRP) and erythrocyte sedimentation rate (ESR)</li> <li>– Bath Ankylosing Spondylitis Functional Index (BASFI)</li> <li>– Bath Ankylosing Spondylitis Metrology Index (BASMI) and chest expansion</li> <li>– Global assessment (patient/physician), general pain and nocturnal pain on the numeric rating scale (NRS)</li> <li>– Assessment of SpondyloArthritis international Society (ASAS) Health Index</li> <li>– Physician Acceptable Symptom State (PhASS)</li> <li>– Patient Acceptable Symptom State (PASS)</li> <li>– Percentage of subjects who achieve an ASAS20, ASAS40, ASAS partial remission, BASDAI50 responses and ASDAS inactive disease state in comparison to baseline;</li> </ul> </li> <li>• Change of the bone and cartilage biomarkers serum levels at week 108 in comparison to baseline and their relevance for the prediction of radiographic progression.</li> <li>• Change of the enteric microbiome profile at week 108 in comparison to baseline.</li> <li>• Change of osteitis score and scores for the chronic post-inflammatory changes in the spine and sacroiliac joints on magnetic resonance imaging (MRI) by Berlin MRI scoring method at week 12 and week 108 in comparison to baseline (MRI sub-study only).</li> </ul> | <p>Adverse events (AE), serious AE and AE of interest until Week 112.</p> |

## REFERENCES:

1. Braun J, Sieper J. Ankylosing spondylitis. *Lancet* 2007;**369**(9570):1379-90.
2. de Winter JJ, van Mens LJ, van der Heijde D, et al. Prevalence of peripheral and extra-articular disease in ankylosing spondylitis versus non-radiographic axial spondyloarthritis: a meta-analysis. *Arthritis Res Ther* 2016;**18**:196.
3. Sieper J, Poddubnyy D. Axial spondyloarthritis. *Lancet* 2017.
4. Feldtkeller E, Bruckel J, Khan MA. Scientific contributions of ankylosing spondylitis patient advocacy groups. *Curr Opin Rheumatol* 2000;**12**(4):239-47.
5. Landewe R, Dougados M, Mielants H, et al. Physical function in ankylosing spondylitis is independently determined by both disease activity and radiographic damage of the spine. *Ann Rheum Dis* 2009;**68**(6):863-7.
6. Franke LC, Ament AJ, van de Laar MA, et al. Cost-of-illness of rheumatoid arthritis and ankylosing spondylitis. *Clin Exp Rheumatol* 2009;**27**(4 Suppl 55):S118-23.
7. van der Heijde D, Ramiro S, Landewe R, et al. 2016 update of the ASAS-EULAR management recommendations for axial spondyloarthritis. *Ann Rheum Dis* 2017.
8. Braun J, Zochling J, Baraliakos X, et al. Efficacy of sulfasalazine in patients with inflammatory back pain due to undifferentiated spondyloarthritis and early ankylosing spondylitis: a multicentre randomised controlled trial. *Ann Rheum Dis* 2006;**65**(9):1147-53.
9. Haibel H, Rudwaleit M, Braun J, et al. Six months open label trial of leflunomide in active ankylosing spondylitis. *Ann Rheum Dis* 2005;**64**(1):124-6.
10. Haibel H, Brandt HC, Song IH, et al. No efficacy of subcutaneous methotrexate in active ankylosing spondylitis: a 16-week open-label trial. *Ann Rheum Dis* 2007;**66**(3):419-21.
11. Baeten D, Sieper J, Braun J, et al. Secukinumab, an Interleukin-17A Inhibitor, in Ankylosing Spondylitis. *N Engl J Med* 2015;**373**(26):2534-48.
12. Wanders A, Heijde D, Landewe R, et al. Nonsteroidal antiinflammatory drugs reduce radiographic progression in patients with ankylosing spondylitis: a randomized clinical trial. *Arthritis Rheum* 2005;**52**(6):1756-65.
13. Yoon DS, Yoo JH, Kim YH, et al. The effects of COX-2 inhibitor during osteogenic differentiation of bone marrow-derived human mesenchymal stem cells. *Stem Cells Dev* 2010;**19**(10):1523-33.
14. Kroon F, Landewe R, Dougados M, et al. Continuous NSAID use reverts the effects of inflammation on radiographic progression in patients with ankylosing spondylitis. *Ann Rheum Dis* 2012;**71**(10):1623-9.
15. Poddubnyy D, Haibel H, Listing J, et al. Baseline radiographic damage, elevated acute-phase reactant levels, and cigarette smoking status predict spinal radiographic progression in early axial spondylarthritis. *Arthritis Rheum* 2012;**64**(5):1388-98.
16. Poddubnyy D, Rudwaleit M, Haibel H, et al. Effect of non-steroidal anti-inflammatory drugs on radiographic spinal progression in patients with axial spondyloarthritis: results from the German Spondyloarthritis Inception Cohort. *Ann Rheum Dis* 2012;**71**(10):1616-22.
17. Sieper J, Listing J, Poddubnyy D, et al. Effect of continuous versus on-demand treatment of ankylosing spondylitis with diclofenac over 2 years on radiographic progression of the spine: results from a randomised multicentre trial (ENRADAS). *Ann Rheum Dis* 2016;**75**(8):1438-43.
18. van der Heijde D, Landewe R, Einstein S, et al. Radiographic progression of ankylosing spondylitis after up to two years of treatment with etanercept. *Arthritis Rheum* 2008;**58**(5):1324-31.
19. van der Heijde D, Landewe R, Baraliakos X, et al. Radiographic findings following two years of infliximab therapy in patients with ankylosing spondylitis. *Arthritis Rheum* 2008;**58**(10):3063-70.
20. van der Heijde D, Salonen D, Weissman BN, et al. Assessment of radiographic progression in the spines of patients with ankylosing spondylitis treated with adalimumab for up to 2 years. *Arthritis Res Ther* 2009;**11**(4):R127.

- 1
- 2
- 3 21. Braun J, Baraliakos X, Hermann KG, et al. The effect of two golimumab doses on radiographic
- 4 progression in ankylosing spondylitis: results through 4 years of the GO-RAISE trial. *Ann*
- 5 *Rheum Dis* 2014;**73**(6):1107-13.
- 6 22. Baraliakos X, Haibel H, Listing J, et al. Continuous long-term anti-TNF therapy does not lead to an
- 7 increase in the rate of new bone formation over 8 years in patients with ankylosing
- 8 spondylitis. *Ann Rheum Dis* 2014;**73**(4):710-5.
- 9 23. Haroon N, Inman RD, Learch TJ, et al. The impact of tumor necrosis factor alpha inhibitors on
- 10 radiographic progression in ankylosing spondylitis. *Arthritis Rheum* 2013;**65**(10):2645-54.
- 11 24. Maksymowych WP, Zheng Y, Wichuk S, et al. The Effect of TNF Inhibition on Radiographic
- 12 Progression in Ankylosing Spondylitis: An Observational Cohort Study of 374 Patients
- 13 [abstract]. *Arthritis Rheumatol* 2015;**67**(suppl 10):1275-76.
- 14 25. Dougados M, Wood E, Combe B, et al. Evaluation of the nonsteroidal anti-inflammatory drug-
- 15 sparing effect of etanercept in axial spondyloarthritis: results of the multicenter, randomized,
- 16 double-blind, placebo-controlled SPARSE study. *Arthritis Res Ther* 2014;**16**(6):481.
- 17 26. Gensler L, Reveille J, Lee M, et al. High Dose Nonsteroidal Anti-Inflammatory Drugs (NSAIDs) and
- 18 Tumor Necrosis Factor Inhibitor Use Results in Less Radiographic Progression in Ankylosing
- 19 Spondylitis – a Longitudinal Analysis [abstract]. *Arthritis Rheumatol* 2016;**68**(Suppl. 10):2481-
- 20 82.
- 21 27. Creemers MC, Franssen MJ, van't Hof MA, et al. Assessment of outcome in ankylosing spondylitis:
- 22 an extended radiographic scoring system. *Ann Rheum Dis* 2005;**64**(1):127-9.
- 23 28. van der Linden S, Valkenburg HA, Cats A. Evaluation of diagnostic criteria for ankylosing
- 24 spondylitis. A proposal for modification of the New York criteria. *Arthritis Rheum*
- 25 1984;**27**(4):361-8.
- 26 29. Deodhar A, Braun J, Inman RD, et al. Golimumab administered subcutaneously every 4 weeks in
- 27 ankylosing spondylitis: 5-year results of the GO-RAISE study. *Ann Rheum Dis* 2015;**74**(4):757-
- 28 61.
- 29
- 30
- 31
- 32
- 33
- 34
- 35
- 36
- 37
- 38
- 39
- 40
- 41
- 42
- 43
- 44
- 45
- 46
- 47
- 48
- 49
- 50
- 51
- 52
- 53
- 54
- 55
- 56
- 57
- 58
- 59
- 60

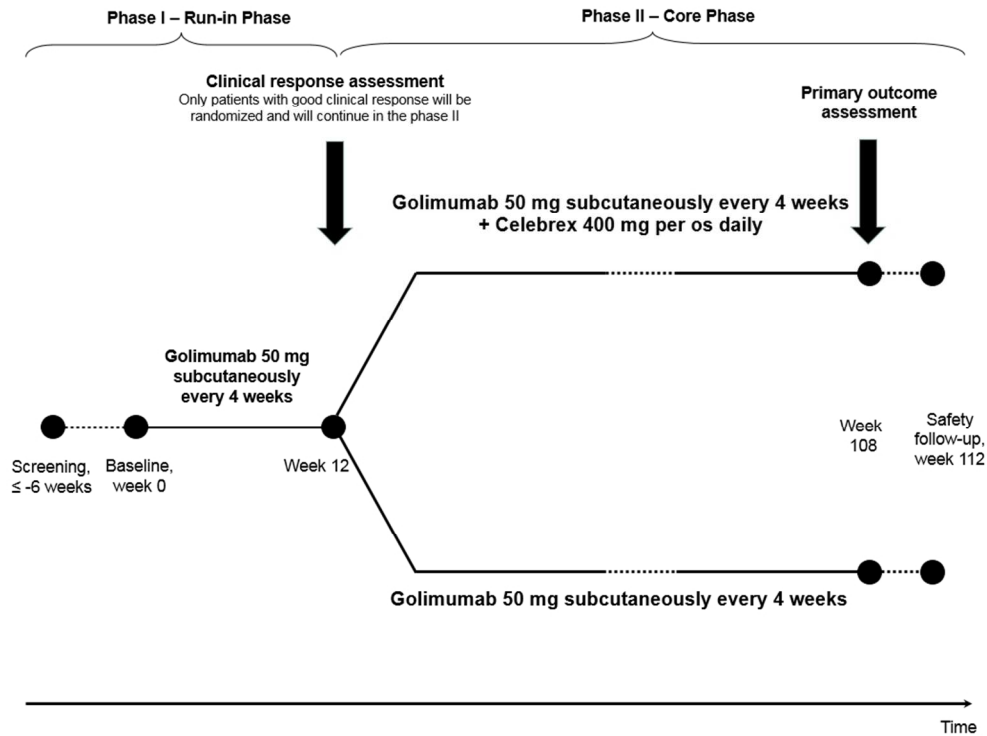

Figure 1: Design of the COMparison of the effect of treatment with NSAIDs added to anti-TNF therapy versus anti-TNF therapy alone on progression of StrUctural damage in the spine over two years in patients with ankylosing spondylitis (CONSUL) study.

figure 1  
88x66mm (300 x 300 DPI)

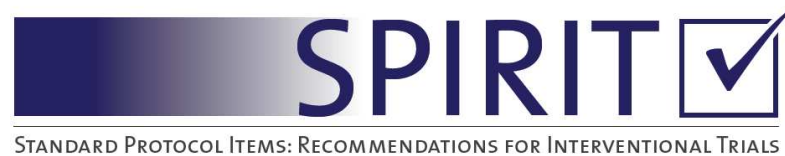

SPIRIT 2013 Checklist: Recommended items to address in a clinical trial protocol and related documents\*

| Section/item                      | Item No | Description                                                                                                                                                                                                                                                                              | Addressed on page number                                                               |
|-----------------------------------|---------|------------------------------------------------------------------------------------------------------------------------------------------------------------------------------------------------------------------------------------------------------------------------------------------|----------------------------------------------------------------------------------------|
| <b>Administrative information</b> |         |                                                                                                                                                                                                                                                                                          |                                                                                        |
| Title                             | 1       | Descriptive title identifying the study design, population, interventions, and, if applicable, trial acronym                                                                                                                                                                             | 1 of 59                                                                                |
| Trial registration                | 2a      | Trial identifier and registry name. If not yet registered, name of intended registry                                                                                                                                                                                                     | ClinicalTrials.gov:<br>NCT02758782<br>EU Clinical Trial<br>Register:<br>2016-000615-33 |
|                                   | 2b      | All items from the World Health Organization Trial Registration Data Set                                                                                                                                                                                                                 | yes                                                                                    |
| Protocol version                  | 3       | Date and version identifier                                                                                                                                                                                                                                                              | 1 of 59                                                                                |
| Funding                           | 4       | Sources and types of financial, material, and other support                                                                                                                                                                                                                              | 12 of 59                                                                               |
| Roles and responsibilities        | 5a      | Names, affiliations, and roles of protocol contributors                                                                                                                                                                                                                                  | 1 of 59                                                                                |
|                                   | 5b      | Name and contact information for the trial sponsor                                                                                                                                                                                                                                       | 1 of 59                                                                                |
|                                   | 5c      | Role of study sponsor and funders, if any, in study design; collection, management, analysis, and interpretation of data; writing of the report; and the decision to submit the report for publication, including whether they will have ultimate authority over any of these activities | N/A                                                                                    |



1  
2  
3  
4  
5  
6  
7  
8  
9  
10  
11  
12  
13  
14  
15  
16  
17  
18  
19  
20  
21  
22  
23  
24  
25  
26  
27  
28  
29  
30  
31  
32  
33  
34  
35  
36  
37  
38  
39  
40  
41  
42  
43  
44  
45  
46  
47  
48  
49

|  |    |                                                                                                                                                                                                                                                                  |     |
|--|----|------------------------------------------------------------------------------------------------------------------------------------------------------------------------------------------------------------------------------------------------------------------|-----|
|  | 5d | Composition, roles, and responsibilities of the coordinating centre, steering committee, endpoint adjudication committee, data management team, and other individuals or groups overseeing the trial, if applicable (see Item 21a for data monitoring committee) | N/A |
|--|----|------------------------------------------------------------------------------------------------------------------------------------------------------------------------------------------------------------------------------------------------------------------|-----|

## Introduction

|                          |    |                                                                                                                                                                                                           |             |
|--------------------------|----|-----------------------------------------------------------------------------------------------------------------------------------------------------------------------------------------------------------|-------------|
| Background and rationale | 6a | Description of research question and justification for undertaking the trial, including summary of relevant studies (published and unpublished) examining benefits and harms for each intervention        | 14-16 of 59 |
|                          | 6b | Explanation for choice of comparators                                                                                                                                                                     | 20-21 of 59 |
| Objectives               | 7  | Specific objectives or hypotheses                                                                                                                                                                         | 17-18 of 59 |
| Trial design             | 8  | Description of trial design including type of trial (eg, parallel group, crossover, factorial, single group), allocation ratio, and framework (eg, superiority, equivalence, noninferiority, exploratory) | 20-33 of 59 |

## Methods: Participants, interventions, and outcomes

|                      |     |                                                                                                                                                                                                |                                                                                                               |
|----------------------|-----|------------------------------------------------------------------------------------------------------------------------------------------------------------------------------------------------|---------------------------------------------------------------------------------------------------------------|
| Study setting        | 9   | Description of study settings (eg, community clinic, academic hospital) and list of countries where data will be collected. Reference to where list of study sites can be obtained             | <a href="https://clinicaltrials.gov/ct2/show/NCT02758782">https://clinicaltrials.gov/ct2/show/NCT02758782</a> |
| Eligibility criteria | 10  | Inclusion and exclusion criteria for participants. If applicable, eligibility criteria for study centres and individuals who will perform the interventions (eg, surgeons, psychotherapists)   | 22-25 of 59                                                                                                   |
| Interventions        | 11a | Interventions for each group with sufficient detail to allow replication, including how and when they will be administered                                                                     | 26-28 of 59                                                                                                   |
|                      | 11b | Criteria for discontinuing or modifying allocated interventions for a given trial participant (eg, drug dose change in response to harms, participant request, or improving/worsening disease) | 28-30 of 59                                                                                                   |
|                      | 11c | Strategies to improve adherence to intervention protocols, and any procedures for monitoring adherence (eg, drug tablet return, laboratory tests)                                              | 28 of 59                                                                                                      |

|    |                                                                     |     |                                                                                                                                                                                                                                                                                                                                                                                |             |
|----|---------------------------------------------------------------------|-----|--------------------------------------------------------------------------------------------------------------------------------------------------------------------------------------------------------------------------------------------------------------------------------------------------------------------------------------------------------------------------------|-------------|
| 1  |                                                                     |     |                                                                                                                                                                                                                                                                                                                                                                                |             |
| 2  |                                                                     |     |                                                                                                                                                                                                                                                                                                                                                                                |             |
| 3  |                                                                     | 11d | Relevant concomitant care and interventions that are permitted or prohibited during the trial                                                                                                                                                                                                                                                                                  | 25 of 59    |
| 4  | Outcomes                                                            | 12  | Primary, secondary, and other outcomes, including the specific measurement variable (eg, systolic blood pressure), analysis metric (eg, change from baseline, final value, time to event), method of aggregation (eg, median, proportion), and time point for each outcome. Explanation of the clinical relevance of chosen efficacy and harm outcomes is strongly recommended | 17-18 of 59 |
| 5  |                                                                     |     |                                                                                                                                                                                                                                                                                                                                                                                |             |
| 6  |                                                                     |     |                                                                                                                                                                                                                                                                                                                                                                                |             |
| 7  |                                                                     |     |                                                                                                                                                                                                                                                                                                                                                                                |             |
| 8  |                                                                     |     |                                                                                                                                                                                                                                                                                                                                                                                |             |
| 9  |                                                                     |     |                                                                                                                                                                                                                                                                                                                                                                                |             |
| 10 | Participant timeline                                                | 13  | Time schedule of enrolment, interventions (including any run-ins and washouts), assessments, and visits for participants. A schematic diagram is highly recommended (see Figure)                                                                                                                                                                                               | 19 of 59    |
| 11 |                                                                     |     |                                                                                                                                                                                                                                                                                                                                                                                |             |
| 12 |                                                                     |     |                                                                                                                                                                                                                                                                                                                                                                                |             |
| 13 | Sample size                                                         | 14  | Estimated number of participants needed to achieve study objectives and how it was determined, including clinical and statistical assumptions supporting any sample size calculations                                                                                                                                                                                          | 47-48 of 59 |
| 14 |                                                                     |     |                                                                                                                                                                                                                                                                                                                                                                                |             |
| 15 |                                                                     |     |                                                                                                                                                                                                                                                                                                                                                                                |             |
| 16 | Recruitment                                                         | 15  | Strategies for achieving adequate participant enrolment to reach target sample size                                                                                                                                                                                                                                                                                            | N/A         |
| 17 |                                                                     |     |                                                                                                                                                                                                                                                                                                                                                                                |             |
| 18 |                                                                     |     |                                                                                                                                                                                                                                                                                                                                                                                |             |
| 19 | <b>Methods: Assignment of interventions (for controlled trials)</b> |     |                                                                                                                                                                                                                                                                                                                                                                                |             |
| 20 | Allocation:                                                         |     |                                                                                                                                                                                                                                                                                                                                                                                |             |
| 21 |                                                                     |     |                                                                                                                                                                                                                                                                                                                                                                                |             |
| 22 | Sequence generation                                                 | 16a | Method of generating the allocation sequence (eg, computer-generated random numbers), and list of any factors for stratification. To reduce predictability of a random sequence, details of any planned restriction (eg, blocking) should be provided in a separate document that is unavailable to those who enrol participants or assign interventions                       | 47 of 59    |
| 23 |                                                                     |     |                                                                                                                                                                                                                                                                                                                                                                                |             |
| 24 |                                                                     |     |                                                                                                                                                                                                                                                                                                                                                                                |             |
| 25 |                                                                     |     |                                                                                                                                                                                                                                                                                                                                                                                |             |
| 26 |                                                                     |     |                                                                                                                                                                                                                                                                                                                                                                                |             |
| 27 |                                                                     |     |                                                                                                                                                                                                                                                                                                                                                                                |             |
| 28 | Allocation concealment mechanism                                    | 16b | Mechanism of implementing the allocation sequence (eg, central telephone; sequentially numbered, opaque, sealed envelopes), describing any steps to conceal the sequence until interventions are assigned                                                                                                                                                                      | 47 of 59    |
| 29 |                                                                     |     |                                                                                                                                                                                                                                                                                                                                                                                |             |
| 30 |                                                                     |     |                                                                                                                                                                                                                                                                                                                                                                                |             |
| 31 |                                                                     |     |                                                                                                                                                                                                                                                                                                                                                                                |             |
| 32 | Implementation                                                      | 16c | Who will generate the allocation sequence, who will enrol participants, and who will assign participants to interventions                                                                                                                                                                                                                                                      | 47 of 59    |
| 33 |                                                                     |     |                                                                                                                                                                                                                                                                                                                                                                                |             |
| 34 |                                                                     |     |                                                                                                                                                                                                                                                                                                                                                                                |             |
| 35 |                                                                     |     |                                                                                                                                                                                                                                                                                                                                                                                |             |
| 36 | Blinding (masking)                                                  | 17a | Who will be blinded after assignment to interventions (eg, trial participants, care providers, outcome assessors, data analysts), and how                                                                                                                                                                                                                                      | N/A         |
| 37 |                                                                     |     |                                                                                                                                                                                                                                                                                                                                                                                |             |
| 38 |                                                                     |     |                                                                                                                                                                                                                                                                                                                                                                                |             |
| 39 |                                                                     | 17b | If blinded, circumstances under which unblinding is permissible, and procedure for revealing a participant's allocated intervention during the trial                                                                                                                                                                                                                           | N/A         |
| 40 |                                                                     |     |                                                                                                                                                                                                                                                                                                                                                                                |             |
| 41 |                                                                     |     |                                                                                                                                                                                                                                                                                                                                                                                |             |
| 42 |                                                                     |     |                                                                                                                                                                                                                                                                                                                                                                                |             |
| 43 |                                                                     |     |                                                                                                                                                                                                                                                                                                                                                                                |             |
| 44 |                                                                     |     |                                                                                                                                                                                                                                                                                                                                                                                |             |
| 45 |                                                                     |     |                                                                                                                                                                                                                                                                                                                                                                                |             |
| 46 |                                                                     |     |                                                                                                                                                                                                                                                                                                                                                                                |             |
| 47 |                                                                     |     |                                                                                                                                                                                                                                                                                                                                                                                |             |
| 48 |                                                                     |     |                                                                                                                                                                                                                                                                                                                                                                                |             |
| 49 |                                                                     |     |                                                                                                                                                                                                                                                                                                                                                                                |             |

1  
2  
3 **Methods: Data collection, management, and analysis**  
4

|                        |     |                                                                                                                                                                                                                                                                                                                                                                                                              |                         |
|------------------------|-----|--------------------------------------------------------------------------------------------------------------------------------------------------------------------------------------------------------------------------------------------------------------------------------------------------------------------------------------------------------------------------------------------------------------|-------------------------|
| 5 Data collection      | 18a | Plans for assessment and collection of outcome, baseline, and other trial data, including any related processes to promote data quality (eg, duplicate measurements, training of assessors) and a description of study instruments (eg, questionnaires, laboratory tests) along with their reliability and validity, if known. Reference to where data collection forms can be found, if not in the protocol | 12-13 of 59             |
| 6 methods              |     |                                                                                                                                                                                                                                                                                                                                                                                                              |                         |
|                        | 18b | Plans to promote participant retention and complete follow-up, including list of any outcome data to be collected for participants who discontinue or deviate from intervention protocols                                                                                                                                                                                                                    | 20 of 59<br>12-13 of 59 |
| 14 Data management     | 19  | Plans for data entry, coding, security, and storage, including any related processes to promote data quality (eg, double data entry; range checks for data values). Reference to where details of data management procedures can be found, if not in the protocol                                                                                                                                            | 49-51 of 59             |
| 15                     |     |                                                                                                                                                                                                                                                                                                                                                                                                              |                         |
| 16                     |     |                                                                                                                                                                                                                                                                                                                                                                                                              |                         |
| 17                     |     |                                                                                                                                                                                                                                                                                                                                                                                                              |                         |
| 18 Statistical methods | 20a | Statistical methods for analysing primary and secondary outcomes. Reference to where other details of the statistical analysis plan can be found, if not in the protocol                                                                                                                                                                                                                                     | 45-46 of 59             |
| 19                     |     |                                                                                                                                                                                                                                                                                                                                                                                                              |                         |
| 20                     |     |                                                                                                                                                                                                                                                                                                                                                                                                              |                         |
| 21                     | 20b | Methods for any additional analyses (eg, subgroup and adjusted analyses)                                                                                                                                                                                                                                                                                                                                     | 46 of 59                |
| 22                     |     |                                                                                                                                                                                                                                                                                                                                                                                                              |                         |
| 23                     | 20c | Definition of analysis population relating to protocol non-adherence (eg, as randomised analysis), and any statistical methods to handle missing data (eg, multiple imputation)                                                                                                                                                                                                                              | 46 of 59                |
| 24                     |     |                                                                                                                                                                                                                                                                                                                                                                                                              |                         |
| 25                     |     |                                                                                                                                                                                                                                                                                                                                                                                                              |                         |
| 26                     |     |                                                                                                                                                                                                                                                                                                                                                                                                              |                         |

27 **Methods: Monitoring**  
28

|                    |     |                                                                                                                                                                                                                                                                                                                                       |                                                                                                               |
|--------------------|-----|---------------------------------------------------------------------------------------------------------------------------------------------------------------------------------------------------------------------------------------------------------------------------------------------------------------------------------------|---------------------------------------------------------------------------------------------------------------|
| 29 Data monitoring | 21a | Composition of data monitoring committee (DMC); summary of its role and reporting structure; statement of whether it is independent from the sponsor and competing interests; and reference to where further details about its charter can be found, if not in the protocol. Alternatively, an explanation of why a DMC is not needed | <a href="https://clinicaltrials.gov/ct2/show/NCT02758782">https://clinicaltrials.gov/ct2/show/NCT02758782</a> |
| 30                 |     |                                                                                                                                                                                                                                                                                                                                       |                                                                                                               |
| 31                 |     |                                                                                                                                                                                                                                                                                                                                       |                                                                                                               |
| 32                 |     |                                                                                                                                                                                                                                                                                                                                       |                                                                                                               |
| 33                 |     |                                                                                                                                                                                                                                                                                                                                       |                                                                                                               |
| 34                 | 21b | Description of any interim analyses and stopping guidelines, including who will have access to these interim results and make the final decision to terminate the trial                                                                                                                                                               | Interim analysis not planned. Trial discontinuation - see p. 30 of 59.                                        |
| 35                 |     |                                                                                                                                                                                                                                                                                                                                       |                                                                                                               |
| 36                 |     |                                                                                                                                                                                                                                                                                                                                       |                                                                                                               |
| 37                 |     |                                                                                                                                                                                                                                                                                                                                       |                                                                                                               |
| 38                 |     |                                                                                                                                                                                                                                                                                                                                       |                                                                                                               |
| 39                 |     |                                                                                                                                                                                                                                                                                                                                       |                                                                                                               |
| 40 Harms           | 22  | Plans for collecting, assessing, reporting, and managing solicited and spontaneously reported adverse events and other unintended effects of trial interventions or trial conduct                                                                                                                                                     | 34-37 of 59                                                                                                   |
| 41                 |     |                                                                                                                                                                                                                                                                                                                                       |                                                                                                               |
| 42                 |     |                                                                                                                                                                                                                                                                                                                                       |                                                                                                               |
| 43                 |     |                                                                                                                                                                                                                                                                                                                                       |                                                                                                               |
| 44                 |     |                                                                                                                                                                                                                                                                                                                                       |                                                                                                               |
| 45                 |     |                                                                                                                                                                                                                                                                                                                                       |                                                                                                               |
| 46                 |     |                                                                                                                                                                                                                                                                                                                                       |                                                                                                               |
| 47                 |     |                                                                                                                                                                                                                                                                                                                                       |                                                                                                               |
| 48                 |     |                                                                                                                                                                                                                                                                                                                                       |                                                                                                               |
| 49                 |     |                                                                                                                                                                                                                                                                                                                                       |                                                                                                               |

|    |                                 |     |                                                                                                                                                                                                                                                                                     |                                                                                                               |
|----|---------------------------------|-----|-------------------------------------------------------------------------------------------------------------------------------------------------------------------------------------------------------------------------------------------------------------------------------------|---------------------------------------------------------------------------------------------------------------|
| 1  |                                 |     |                                                                                                                                                                                                                                                                                     |                                                                                                               |
| 2  |                                 |     |                                                                                                                                                                                                                                                                                     |                                                                                                               |
| 3  | Auditing                        | 23  | Frequency and procedures for auditing trial conduct, if any, and whether the process will be independent from investigators and the sponsor                                                                                                                                         | 52 of 59                                                                                                      |
| 4  |                                 |     |                                                                                                                                                                                                                                                                                     |                                                                                                               |
| 5  |                                 |     |                                                                                                                                                                                                                                                                                     |                                                                                                               |
| 6  | <b>Ethics and dissemination</b> |     |                                                                                                                                                                                                                                                                                     |                                                                                                               |
| 7  |                                 |     |                                                                                                                                                                                                                                                                                     |                                                                                                               |
| 8  | Research ethics approval        | 24  | Plans for seeking research ethics committee/institutional review board (REC/IRB) approval                                                                                                                                                                                           | 43 of 59                                                                                                      |
| 9  |                                 |     |                                                                                                                                                                                                                                                                                     |                                                                                                               |
| 10 |                                 |     |                                                                                                                                                                                                                                                                                     |                                                                                                               |
| 11 | Protocol amendments             | 25  | Plans for communicating important protocol modifications (eg, changes to eligibility criteria, outcomes, analyses) to relevant parties (eg, investigators, REC/IRBs, trial participants, trial registries, journals, regulators)                                                    | 42, 44 of 59                                                                                                  |
| 12 |                                 |     |                                                                                                                                                                                                                                                                                     |                                                                                                               |
| 13 |                                 |     |                                                                                                                                                                                                                                                                                     |                                                                                                               |
| 14 |                                 |     |                                                                                                                                                                                                                                                                                     |                                                                                                               |
| 15 | Consent or assent               | 26a | Who will obtain informed consent or assent from potential trial participants or authorised surrogates, and how (see Item 32)                                                                                                                                                        | 41-42 of 59                                                                                                   |
| 16 |                                 |     |                                                                                                                                                                                                                                                                                     |                                                                                                               |
| 17 |                                 |     |                                                                                                                                                                                                                                                                                     |                                                                                                               |
| 18 |                                 |     |                                                                                                                                                                                                                                                                                     |                                                                                                               |
| 19 |                                 | 26b | Additional consent provisions for collection and use of participant data and biological specimens in ancillary studies, if applicable                                                                                                                                               | N/A                                                                                                           |
| 20 |                                 |     |                                                                                                                                                                                                                                                                                     |                                                                                                               |
| 21 |                                 |     |                                                                                                                                                                                                                                                                                     |                                                                                                               |
| 22 | Confidentiality                 | 27  | How personal information about potential and enrolled participants will be collected, shared, and maintained in order to protect confidentiality before, during, and after the trial                                                                                                | 53 of 59                                                                                                      |
| 23 |                                 |     |                                                                                                                                                                                                                                                                                     |                                                                                                               |
| 24 |                                 |     |                                                                                                                                                                                                                                                                                     |                                                                                                               |
| 25 | Declaration of interests        | 28  | Financial and other competing interests for principal investigators for the overall trial and each study site                                                                                                                                                                       | N/A                                                                                                           |
| 26 |                                 |     |                                                                                                                                                                                                                                                                                     |                                                                                                               |
| 27 |                                 |     |                                                                                                                                                                                                                                                                                     |                                                                                                               |
| 28 | Access to data                  | 29  | Statement of who will have access to the final trial dataset, and disclosure of contractual agreements that limit such access for investigators                                                                                                                                     | PI, SI and Study biostatistician                                                                              |
| 29 |                                 |     |                                                                                                                                                                                                                                                                                     |                                                                                                               |
| 30 |                                 |     |                                                                                                                                                                                                                                                                                     |                                                                                                               |
| 31 | Ancillary and post-trial care   | 30  | Provisions, if any, for ancillary and post-trial care, and for compensation to those who suffer harm from trial participation                                                                                                                                                       | 38, 42 of 59                                                                                                  |
| 32 |                                 |     |                                                                                                                                                                                                                                                                                     |                                                                                                               |
| 33 |                                 |     |                                                                                                                                                                                                                                                                                     |                                                                                                               |
| 34 | Dissemination policy            | 31a | Plans for investigators and sponsor to communicate trial results to participants, healthcare professionals, the public, and other relevant groups (eg, via publication, reporting in results databases, or other data sharing arrangements), including any publication restrictions | <a href="https://clinicaltrials.gov/ct2/show/NCT02758782">https://clinicaltrials.gov/ct2/show/NCT02758782</a> |
| 35 |                                 |     |                                                                                                                                                                                                                                                                                     |                                                                                                               |
| 36 |                                 |     |                                                                                                                                                                                                                                                                                     |                                                                                                               |
| 37 |                                 |     |                                                                                                                                                                                                                                                                                     |                                                                                                               |
| 38 |                                 | 31b | Authorship eligibility guidelines and any intended use of professional writers                                                                                                                                                                                                      | N/A                                                                                                           |
| 39 |                                 |     |                                                                                                                                                                                                                                                                                     |                                                                                                               |
| 40 |                                 |     |                                                                                                                                                                                                                                                                                     |                                                                                                               |
| 41 |                                 |     |                                                                                                                                                                                                                                                                                     |                                                                                                               |
| 42 |                                 |     |                                                                                                                                                                                                                                                                                     |                                                                                                               |
| 43 |                                 |     |                                                                                                                                                                                                                                                                                     |                                                                                                               |
| 44 |                                 |     |                                                                                                                                                                                                                                                                                     |                                                                                                               |
| 45 |                                 |     |                                                                                                                                                                                                                                                                                     |                                                                                                               |
| 46 |                                 |     |                                                                                                                                                                                                                                                                                     |                                                                                                               |
| 47 |                                 |     |                                                                                                                                                                                                                                                                                     |                                                                                                               |
| 48 |                                 |     |                                                                                                                                                                                                                                                                                     |                                                                                                               |
| 49 |                                 |     |                                                                                                                                                                                                                                                                                     |                                                                                                               |

1  
2  
3  
4  
5  
6  
7  
8  
9  
10  
11  
12  
13  
14  
15  
16  
17  
18  
19  
20  
21  
22  
23  
24  
25  
26  
27  
28  
29  
30  
31  
32  
33  
34  
35  
36  
37  
38  
39  
40  
41  
42  
43  
44  
45  
46  
47  
48  
49

|  |     |                                                                                                                 |                                                                                                               |
|--|-----|-----------------------------------------------------------------------------------------------------------------|---------------------------------------------------------------------------------------------------------------|
|  | 31c | Plans, if any, for granting public access to the full protocol, participant-level dataset, and statistical code | <a href="https://clinicaltrials.gov/ct2/show/NCT02758782">https://clinicaltrials.gov/ct2/show/NCT02758782</a> |
|--|-----|-----------------------------------------------------------------------------------------------------------------|---------------------------------------------------------------------------------------------------------------|

**Appendices**

|                            |    |                                                                                                                                                                                                |                                            |
|----------------------------|----|------------------------------------------------------------------------------------------------------------------------------------------------------------------------------------------------|--------------------------------------------|
| Informed consent materials | 32 | Model consent form and other related documentation given to participants and authorised surrogates                                                                                             | N/A<br>(only available in German language) |
| Biological specimens       | 33 | Plans for collection, laboratory evaluation, and storage of biological specimens for genetic or molecular analysis in the current trial and for future use in ancillary studies, if applicable | N/A                                        |

---

\*It is strongly recommended that this checklist be read in conjunction with the SPIRIT 2013 Explanation & Elaboration for important clarification on the items. Amendments to the protocol should be tracked and dated. The SPIRIT checklist is copyrighted by the SPIRIT Group under the Creative Commons "[Attribution-NonCommercial-NoDerivs 3.0 Unported](https://creativecommons.org/licenses/by-nc-nd/3.0/)" license.
